# Supplementary material
Source: publisher figshare collection journal article supplement (https://acs.figshare.com/ndownloader/files/4532017)

# Synthesis of Iriomoteolide-1a C12-C23 Fragment via Asymmetric Conjugate Addition and Julia-Kocienski Coupling

Yen-Jin Chin, Shun-Yi Wang and Teck-Peng Loh\*

*Division of Chemistry and Biological Chemistry, School of Physical and Mathematical Sciences,  
Nanyang Technological University, Singapore 637371*

## Supporting Information

### Table of Contents

|                                                                    |     |
|--------------------------------------------------------------------|-----|
| General Methods.....                                               | S2  |
| Experimental Procedures and Characterization Data of Products..... | S3  |
| <sup>1</sup> H and <sup>13</sup> C NMR Spectra of Products.....    | S23 |

## **General Methods**

Experiments involving moisture and/or air sensitive components were performed in oven-dried glassware under a positive pressure of nitrogen using freshly distilled solvents. Commercial grade solvents and reagents were used without further purification with the following exceptions: *t*-BuOMe and CH<sub>2</sub>Cl<sub>2</sub> were distilled from calcium hydride. Diethyl ether was distilled from sodium.

Analytical thin layer chromatography (TLC) was performed using Merck 60 F254 precoated silica gel plate (0.2 mm thickness). Subsequent to elution, plates were visualized using UV radiation (254 nm) on Spectoline Model ENF-24061/F 254 nm. Further visualization was possible by staining with basic solution of potassium permanganate or acidic solution of ceric molybdate. Flash chromatography was performed using Merck silica gel 60 with freshly distilled solvents. Columns were typically packed as slurry and equilibrated with the appropriate solvent system prior to use.

Infrared spectra were recorded on a Bio-Rad FTS 165 FTIR spectrometer. The oil samples were examined under neat conditions. High Resolution Mass Spectrometry (HRMS) spectra were obtained using Finnigan MAT95XP GC/HRMS (Thermo Electron Corporation).

Proton nuclear magnetic resonance spectra (<sup>1</sup>H NMR) were recorded on a Bruker Avance DPX 300 and Bruker AMX 400 spectrophotometer (CDCl<sub>3</sub> as solvent). Chemical shifts for <sup>1</sup>H NMR spectra are reported as δ in units of parts per million (ppm) downfield from TMS (δ 0.0) and relative to the signal of chloroform-*d* (δ 7.260, singlet) as the internal standard. Multiplicities were given as: s (singlet); d (doublet); t (triplet); q (quartet); dd (doublets of doublet); ddd (doublets of doublets of doublet); dddd (doublets of doublets of doublets of doublet); dt (doublets of triplet); or m (multiplets). The number of protons (n) for given resonance is indicated by nH. Coupling constants are reported as a *J* value in Hz. Carbon nuclear magnetic resonance spectra (<sup>13</sup>C NMR) are reported as δ in units of parts per million (ppm) downfield from SiMe<sub>4</sub> (δ 0.0) and relative to the signal of chloroform-*d* (δ 77.03, triplet). The proportion of diastereomers and geometric isomers was determined from the integration of <sup>1</sup>H NMR and <sup>13</sup>C NMR spectra.

Enantioselectivities were determined by capillary GC analysis (Chiraldex G-TA column (30 m x 0.25 mm)), using the flame ionization detector. Optical rotations were measured in CHCl<sub>3</sub> on a *Schmidt + Haensdch* polarimeter (Polartronic MH8) with 10.0 mm cell (*c* given in g/100 mL). Absolute configurations of the products were determined by comparison with known compounds.

## Experimental Procedures and Characterization Data of Products

(5*R*,9*S*,10*R*,12*S*,13*S*,*E*)-5-((4*R*,5*R*)-5-cyclohexyl-2,2-dimethyl-1,3-dioxolan-4-yl)-3,3-diethyl-5,9,12,13,15,15,16,16-octamethyl-10-(triethylsilyloxy)-4,14-dioxa-3,15-disilaheptadec-6-ene (4a)

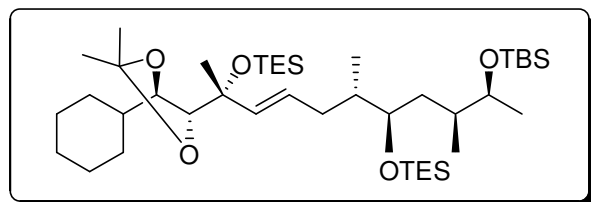

To a stirred solution of sulfone **6** (31.1 mg, 0.05 mmol) in anhydrous THF (1 mL) at -78 °C was added dropwise a solution of KHMDS (0.1 mL, 15% in toluene, 0.06 mmol) in THF over 5 minutes. The blue solution was stirred for 30 minutes during which time the solution became green. A solution of aldehyde **5** (27.8 mg, 0.075 mmol) in THF (0.5 mL) was added dropwise over 5 minutes and the mixture was stirred at -78 °C for 1 h. The cooling bath was removed and the mixture was stirred at ambient temperature overnight. The solution has changed from dark brown to light yellow. After a night, water was added and continued stirring for 1 h. The reaction was quenched with brine (10 mL) and extracted with Et<sub>2</sub>O (10 mL x 3). The combined organic extracts were dried over anhydrous sodium sulfate, filtered and concentrated *in vacuo*. The resulting residue was purified by flash chromatography (hexane/Et<sub>2</sub>O 100: 1) to afford the desired *trans*-product as colorless oil (11.0 mg, 29% yield; 48% total yield for the mixture of *E/Z* isomers, 60: 40).

**R<sub>f</sub> value (hexane/Et<sub>2</sub>O 14: 1): 0.52.**

$[\alpha]_D^{20} = -0.014$  ( $c = 1.0$ , CHCl<sub>3</sub>).

**<sup>1</sup>H NMR (300 MHz, CDCl<sub>3</sub>):**  $\delta$  5.73 (d,  $J = 15.6$  Hz, 1H), 5.58-5.48 (m, 1H), 3.85-3.80 (m, 2H), 3.72-3.68 (m, 2H), 2.10-1.58 (m, 10H), 1.47-1.44 (m, 2H), 1.38 (s, 6H), 1.29 (s, 3H), 1.19-1.17 (m, 4H), 1.08 (d, 2H), 0.99-0.85 (m, 33H), 0.65-0.58 (m, 12H), 0.04 (s, 3H), 0.03 (s, 3H).

**<sup>13</sup>C NMR (75 MHz, CDCl<sub>3</sub>):**  $\delta$  134.9 (CH), 128.3 (CH), 106.3 (C), 83.9 (CH), 83.2 (CH), 77.0 (C), 75.1 (CH), 71.2 (CH), 38.2 (CH), 37.3 (CH<sub>2</sub>), 36.2 (CH<sub>2</sub>), 35.6 (CH), 34.5 (CH), 31.6 (CH<sub>2</sub>), 30.2 (CH<sub>2</sub>), 27.3 (CH<sub>3</sub>), 26.9 (CH<sub>2</sub>), 26.6 (CH<sub>2</sub>), 25.9 (CH<sub>2</sub>), 25.8 (CH<sub>3</sub>), 25.1 (CH<sub>3</sub>), 20.8 (CH<sub>3</sub>), 18.1 (C), 15.4 (CH<sub>3</sub>), 15.0 (CH<sub>3</sub>), 7.2 (CH<sub>2</sub>), 7.0 (CH<sub>3</sub>), 6.8 (CH<sub>2</sub>), 5.3 (CH<sub>3</sub>), -4.0 (CH<sub>3</sub>), -4.8 (CH<sub>3</sub>).

**FTIR (NaCl, neat):**  $\nu$  2955, 1377, 1254, 1065, 1005, 835, 743 cm<sup>-1</sup>.

**HRMS (ESI)** calcd. for C<sub>42</sub>H<sub>87</sub>O<sub>5</sub>Si<sub>3</sub> (M+1) 755.5861, found 755.5818.

**(5*S*,6*S*,8*R*)-8-((2*S*,6*R*,*E*)-6-((4*R*,5*R*)-5-cyclohexyl-2,2-dimethyl-1,3-dioxolan-4-yl)-6-(4-methoxybenzyloxy)hept-4-en-2-yl)-10,10-diethyl-2,2,3,3,5,6-hexamethyl-4,9-dioxa-3,10-disiladodecane (4b)**

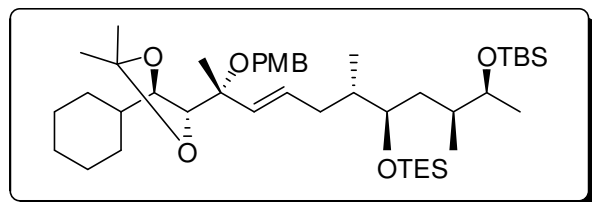

To a stirred solution of sulfone **6** (31.1 mg, 0.05 mmol) in anhydrous THF (1 mL) at -78 °C was added dropwise a solution of KHMDS (0.1 mL, 15% in toluene, 0.06 mmol) in THF over 5 minutes. The blue solution was stirred for 30 minutes during which time the solution became green. A solution of aldehyde **5** (28.2 mg, 0.075 mmol) in THF (0.5 mL) was added dropwise over 5 minutes and the mixture was stirred at -78 °C for 1 h. The cooling bath was removed and the mixture was stirred at ambient temperature overnight. The solution has changed from dark brown to light yellow. After a night, water was added and stirring was continued for 1 h. The reaction was quenched with brine (10 mL) and extracted with Et<sub>2</sub>O (10 mL x 3). The combined organic extracts were dried over anhydrous sodium sulfate, filtered and concentrated *in vacuo*. From the <sup>1</sup>H NMR analysis, the desired product was in trace amount.

**(S)-2-((4R,5R)-5-cyclohexyl-2,2-dimethyl-1,3-dioxolan-4-yl)-2-(triethylsilyloxy)propanal (5)**

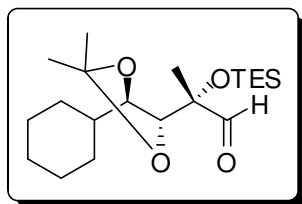

Alkene **12a** (0.369 g, 1.00 mmol) and  $\text{CH}_2\text{Cl}_2$  (2 mL) were added to a round bottom flask equipped with a magnetic stirrer bar and cooled to  $-78^\circ\text{C}$ . The reaction mixture was purged with  $\text{O}_2$  for a few minutes followed by supplying of  $\text{O}_3$ . The completion of the reaction was indicated by color changing of the solution (from colorless to blue). After the completion of the reaction, the supply of  $\text{O}_3$  was stopped. The reaction mixture was purged with  $\text{O}_2$  for a few minutes and quenched with  $\text{PPh}_3$  (0.289 g, 1.10 mmol). The reaction was cooled to room temperature and stirred vigorously for 10 min.  $\text{CH}_2\text{Cl}_2$  was evaporated *in vacuo* and the resulting residue was purified by flash column chromatography (hexane/ $\text{Et}_2\text{O}$  80: 1) to afford the desired product as colorless oil (0.274 g, 74% yield).

**$R_f$  value (hexane/  $\text{Et}_2\text{O}$  8: 1):** 0.45.

$[\alpha]_{\text{D}}^{20} = -0.042$  ( $c = 1.06$ ,  $\text{CHCl}_3$ ).

**$^1\text{H}$  NMR (400 MHz,  $\text{CDCl}_3$ ):**  $\delta$  9.80 (s, 1H), 4.00 (d,  $J = 5.2$  Hz, 1H), 3.87-3.83 (m, 1H), 2.00-1.92 (m, 3H), 1.70-1.66 (m, 3H), 1.40 (s, 3H), 1.37 (s, 3H), 1.29 (s, 3H), 1.25-1.15 (m, 3H), 0.96 (t,  $J = 7.9$  Hz, 9H), 0.98-0.94 (m, 2H), 0.62 (q,  $J = 7.7$  Hz, 6H).

**$^{13}\text{C}$  NMR (75 MHz,  $\text{CDCl}_3$ ):**  $\delta$  202.3 (C), 107.2 (C), 83.2 (CH), 82.9 (CH), 81.7 (C), 36.3 (CH), 31.3 ( $\text{CH}_2$ ), 30.2 ( $\text{CH}_2$ ), 26.5 ( $\text{CH}_2$ ), 25.5 ( $\text{CH}_2$ ), 25.4 ( $\text{CH}_2$ ), 25.0 ( $\text{CH}_3$ ), 21.8 ( $\text{CH}_3$ ), 6.9 ( $\text{CH}_2$ ), 6.4 ( $\text{CH}_3$ ).

**FTIR (NaCl, neat):**  $\nu$  2930, 1736, 1381, 1217, 1049, 745  $\text{cm}^{-1}$ .

**HRMS (ESI)** calcd. for  $\text{C}_{20}\text{H}_{39}\text{O}_4\text{Si}$  ( $\text{M}+1$ ) 371.2618, found 371.2603.

**(S)-2-((4R,5R)-5-cyclohexyl-2,2-dimethyl-1,3-dioxolan-4-yl)-2-(4-methoxybenzyloxy)propanal (5a)**

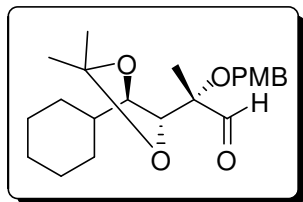

Alkene **12b** (0.375 g, 1.00 mmol) and  $\text{CH}_2\text{Cl}_2$  (2 mL) were added to a round bottom flask equipped with a magnetic stirrer bar and cooled to  $-78^\circ\text{C}$ . The reaction mixture was purged with  $\text{O}_2$  for a few minutes followed by supplying of  $\text{O}_3$ . The completion of the reaction was indicated by color changing of the solution (from colorless to blue). After the completion of the reaction, the supply of  $\text{O}_3$  was stopped. The reaction mixture was purged with  $\text{O}_2$  for a few minutes and quenched with  $\text{PPh}_3$  (0.289 g, 1.10 mmol). The reaction was cooled to room temperature and stirred vigorously for 10 min.  $\text{CH}_2\text{Cl}_2$  was evaporated *in vacuo* and the resulting residue was purified by flash column chromatography (hexane/ $\text{Et}_2\text{O}$  40: 1) to afford the desired product as colorless oil (0.290 g, 77% yield).

**$R_f$  value (hexane/ $\text{Et}_2\text{O}$  4: 1):** 0.34.

**$^1\text{H}$  NMR (400 MHz,  $\text{CDCl}_3$ ):**  $\delta$  9.92 (s, 1H), 7.00 (m, 2H), 6.87 (d,  $J = 8.2$  Hz, 2H), 4.44 (d,  $J = 10.4$  Hz, 1H), 4.32 (d,  $J = 10.3$  Hz, 1H), 4.07 (d,  $J = 4.88$  Hz, 1H), 3.90-3.86 (m, 1H), 3.86 (s, 3H), 2.08-0.84 (m, 20H).

**5-((3*S*,4*R*,6*S*,7*S*)-7-(*tert*-butyldimethylsilyloxy)-3,6-dimethyl-4-(triethylsilyloxy)octylsulfonyl)-1-phenyl-1*H*-tetrazole (6)**

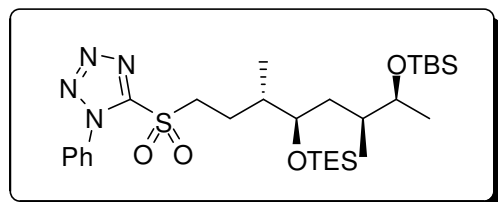

In a round bottom flask equipped with a rubber septum and a magnetic stirrer bar, sulfone **22** (0.496 g, 1.00 mmol) was dissolved in 2 mL of dry pyridine. DMAP (0.012 g, 0.10 mmol) and TESCl (0.301 g, 2.00 mmol) were added to the reaction mixture and stirred at room temperature. After stirring for 12 h, the reaction was diluted with Et<sub>2</sub>O and washed with brine. The organic extracts were dried over anhydrous sodium sulfate, filtered and concentrated *in vacuo*. The resulting residue was purified by flash chromatography (hexane/Et<sub>2</sub>O 10: 1) to afford the desired product as colorless oil (0.605 g, 99% yield).

**R<sub>f</sub> value (hexane/Et<sub>2</sub>O 2: 1): 0.55.**

$[\alpha]_D^{20} = -0.007$  ( $c = 0.9$ , CHCl<sub>3</sub>).

**<sup>1</sup>H NMR (400 MHz, CDCl<sub>3</sub>):**  $\delta$  7.71-7.68 (m, 2H), 7.62-7.59 (m, 3H), 3.97-3.89 (m, 1H), 3.71-3.64 (m, 3H), 1.99-1.96 (m, 1H), 1.88-1.86 (m, 1H), 1.78-1.77 (m, 1H), 1.64-1.57 (m, 1H), 1.39-1.36 (m, 1H), 1.31-1.25 (m, 1H), 1.07 (d,  $J = 5.6$  Hz, 3H), 1.02 (d,  $J = 7.5$  Hz, 3H), 0.95 (t,  $J = 7.9$  Hz, 9H), 0.86 (s, 9H), 0.85 (d,  $J = 7.5$  Hz, 3H), 0.58 (q,  $J = 7.9$  Hz, 6H), 0.03 (s, 6H).

**<sup>13</sup>C NMR (100 MHz, CDCl<sub>3</sub>):**  $\delta$  153.4 (C), 133.1 (C), 131.3 (CH), 129.6 (CH), 125.0 (CH), 74.5 (CH), 71.6 (CH), 54.4 (CH<sub>2</sub>), 37.6 (CH<sub>2</sub>), 37.1 (CH), 35.1 (CH<sub>2</sub>), 25.8 (CH<sub>3</sub>), 22.5 (CH), 20.7 (CH<sub>3</sub>), 18.0 (C), 16.2 (CH<sub>3</sub>), 14.3 (CH<sub>3</sub>), 6.9 (CH<sub>2</sub>), 5.1 (CH<sub>3</sub>), -4.2 (CH<sub>3</sub>), -4.9 (CH<sub>3</sub>).

**FTIR (NaCl, neat):**  $\nu$  2957, 1595, 1499, 1339, 1153, 837, 762 cm<sup>-1</sup>.

**HRMS (ESI) calcd. for C<sub>29</sub>H<sub>55</sub>N<sub>4</sub>O<sub>4</sub>SSi<sub>2</sub> (M+1) 611.3483, found 611.3475.**

**(3*R*,4*R*)-4-cyclohexyl-3,4-dihydroxybutan-2-one (9)**

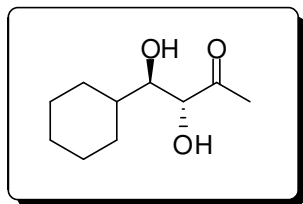

To a mixture of anhydrous DMSO (6 mL) and hydroxyacetone **8** (2 mL) was added the aldehyde **7** (0.112 g, 1.00 mmol) followed by *D*-proline (0.023 g, 20 mol%) respectively, and the resulting homogenous reaction mixture was stirred at room temperature for 60 h. Then, half saturated NH<sub>4</sub>Cl solution (10 mL) and ethyl acetate (10 mL) were added with stirring. The layers were separated and the aqueous phase was extracted with ethyl acetate (10 mL x 3). The combined organic layers were dried over anhydrous magnesium sulfate, filtered and concentrated *in vacuo*. The resulting residue was purified by flash column chromatography (hexane/EtOAc 5: 1) to afford the desired product as white solid (0.111 g, 60% yield; dr > 20: 1). The enantiomeric excess was determined by HPLC analysis (chiral Daicel Chiralpak AS, hexane: *i*-PrOH = 85: 15, flow rate 1.0 mL/min.,  $\lambda$  = 285 nm:  $t_R$  = 7.70 min).

**R<sub>f</sub> value (hexane/EtOAc 1: 2): 0.45.**

$[\alpha]_D^{20}$  = -81.6 ( $c$  = 1.0, CHCl<sub>3</sub>) Lit.  $[\alpha]_D$  = +83 ( $c$  = 1.0, CHCl<sub>3</sub>) of (3*S*,4*S*)-4-cyclohexyl-3,4-dihydroxybutan-2-one.

**<sup>1</sup>H NMR (300 MHz, CDCl<sub>3</sub>):**  $\delta$  4.23 (d,  $J$  = 5.4 Hz, 2H), 3.51-3.54 (m, 2H), 2.31 (s, 4H), 1.53-1.93 (m, 6H), 1.04-1.29 (m, 5H).

**<sup>13</sup>C NMR (75 MHz, CDCl<sub>3</sub>):**  $\delta$  209.8 (C), 78.3 (CH), 77.6 (CH), 39.8 (CH), 29.7 (CH<sub>2</sub>), 27.7 (CH<sub>2</sub>), 27.4 (CH<sub>2</sub>), 26.2 (CH<sub>3</sub>), 26.1 (CH<sub>2</sub>), 25.8 (CH<sub>2</sub>).

**FTIR (KBr, neat):**  $\nu$  3381, 2920, 2850, 1697 (C=O), 1421, 1359, 1076, 1039, 983 cm<sup>-1</sup>.

**HRMS (ESI)** calcd. for C<sub>10</sub>H<sub>19</sub>O<sub>3</sub> (M+1) 187.1329, found 187.1334.



**1-((4*R*,5*R*)-5-cyclohexyl-2,2-dimethyl-1,3-dioxolan-4-yl)ethanone (10)**

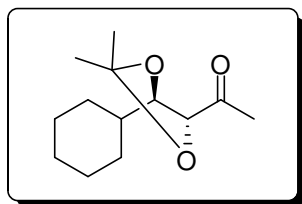

In a round bottom flask equipped with a rubber septum and a magnetic stirrer bar, diol **9** (0.186 g, 1.00 mmol) was dissolved in CH<sub>2</sub>Cl<sub>2</sub> (2 mL) at 25 °C. 2-Methoxy-propene (1.041 g, 10.0 mmol) and (1*S*)-(+)-camphor-10-sulfonic acid (0.013 g, 0.05 mmol) were added to the reaction mixture. The reaction mixture was stirred at room temperature for overnight. The reaction mixture was quenched with water (10 mL) and the biphasic reaction mixture was extracted with diethyl ether (10 mL x 3). The combined organic extracts were dried over anhydrous sodium sulfate, filtered and concentrated *in vacuo*. The resulting residue was purified by flash chromatography (hexane/Et<sub>2</sub>O 40: 1) to afford the desired product as colorless oil (0.204 g, 90% yield).

**R<sub>f</sub> value (hexane/Et<sub>2</sub>O 8: 1):** 0.34.

$[\alpha]_D^{20} = +0.87$  ( $c = 1.2$ , CHCl<sub>3</sub>).

**<sup>1</sup>H NMR (400 MHz, CDCl<sub>3</sub>):**  $\delta$  4.32 (d,  $J = 7.6$  Hz, 1H), 4.02 (dd,  $J = 8.8, 7.6$  Hz, 1H), 2.26 (s, 3H), 1.63-1.87 (m, 5H), 1.60 (s, 3H), 1.34 (s, 3H), 0.92-1.25 (m, 6H).

**<sup>13</sup>C NMR (100 MHz, CDCl<sub>3</sub>):**  $\delta$  209.7 (C), 109.4 (C), 82.8 (CH), 82.6 (CH), 37.6 (CH), 29.7 (CH<sub>2</sub>), 29.3 (CH<sub>2</sub>), 28.4 (CH<sub>2</sub>), 26.6 (CH<sub>2</sub>), 26.2 (CH<sub>2</sub>), 25.4 (CH<sub>3</sub>), 24.8 (CH<sub>3</sub>).

**FTIR (KBr, neat):**  $\nu$  2927, 2854, 1708 (C=O), 1450, 1355, 1060 cm<sup>-1</sup>.

**HRMS (ESI)** calcd. for C<sub>13</sub>H<sub>23</sub>O<sub>3</sub> (M+1) 227.1650, found 227.1647.

**(R)-2-((4R,5R)-5-cyclohexyl-2,2-dimethyl-1,3-dioxolan-4-yl)but-3-en-2-ol (11a)**

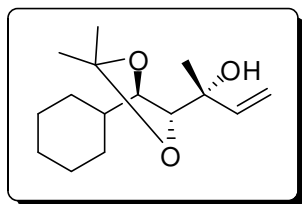

To an oven-dried two neck round bottom flask equipped with a rubber septum and a magnetic stirrer bar was added magnesium (0.048 g, 2.00 mmol) and one crystal of iodine. Vinylbromide (0.5 mL, 1.0 M solution in THF, 0.50 mmol) was added to the flask and heated the mixture at reflux until the iodine color had disappeared. The vinylbromide solution (1.5 mL, 1.50 mmol) was added dropwise at such a rate that a gentle reflux was maintained. After refluxing for another 3 h, the reaction mixture was cooled to room temperature and immersed into 0 °C cryobath. Precursor **10** (0.226 g, 1.00 mmol) in THF (1 mL) was added dropwise over 2 h via syringe pump. After stirring at 0 °C overnight, the reaction mixture was quenched with NH<sub>4</sub>Cl solution and the biphasic reaction mixture was extracted with diethyl ether (10 mL x 3). The combined organic extracts were dried over anhydrous sodium sulfate, filtered and concentrated *in vacuo*. The resulting residue was purified by flash chromatography (hexane/Et<sub>2</sub>O 40: 1) to afford the desired product **11a** as colorless oil (0.211 g, 83% yield; 92% total yield for the two isomers, dr = 90: 10).

**R<sub>f</sub> value (hexane/Et<sub>2</sub>O 4: 1): 0.25.**

$[\alpha]_D^{20} = -29.1$  ( $c = 1.0$ , CHCl<sub>3</sub>).

**<sup>1</sup>H NMR (400 MHz, CDCl<sub>3</sub>):**  $\delta$  6.05 (dd,  $J = 23.2, 14.4$  Hz, 1H), 5.34 (dd,  $J = 23.2, 2.0$  Hz, 1H), 5.16 (dd,  $J = 14.4, 2.0$  Hz, 1H), 3.95 (d,  $J = 2.0$  Hz, 1H), 3.87 (dd,  $J = 12.0, 8.0$  Hz, 1H), 2.23 (s, 1H), 1.66-2.04 (m, 5H), 1.50 (s, 3H), 1.34 (s, 3H), 1.33 (s, 3H), 1.23-1.28 (m, 6H).

**<sup>13</sup>C NMR (100 MHz, CDCl<sub>3</sub>):**  $\delta$  142.5 (CH), 113.3 (CH<sub>2</sub>), 106.7 (C), 82.7 (CH), 82.4 (CH), 74.7 (C), 36.3 (CH), 31.7 (CH<sub>2</sub>), 30.3 (CH<sub>2</sub>), 28.7 (CH<sub>3</sub>), 26.4 (CH<sub>3</sub>), 25.7 (CH<sub>2</sub>), 25.5 (CH<sub>2</sub>), 25.4 (CH<sub>2</sub>), 25.0 (CH<sub>3</sub>).

**FTIR (KBr, neat):**  $\nu$  3425, 2989, 2927, 2852, 1651, 1381, 1255, 1033, 758 cm<sup>-1</sup>.

**HRMS (ESI) calcd.** for C<sub>15</sub>H<sub>27</sub>O<sub>3</sub> (M+1) 255.1958, found 255.1960.

**(S)-2-((4R,5R)-5-cyclohexyl-2,2-dimethyl-1,3-dioxolan-4-yl)but-3-en-2-ol (11b)**

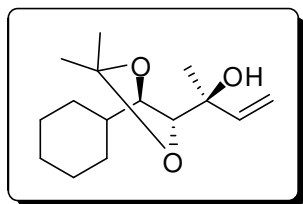

**R<sub>f</sub> value (hexane/Et<sub>2</sub>O 4: 1):** 0.33.

**[ $\alpha$ ]<sub>D</sub><sup>20</sup>** = -42.2 (*c* = 1.5, CHCl<sub>3</sub>).

**<sup>1</sup>H NMR (300 MHz, CDCl<sub>3</sub>):**  $\delta$  6.01 (dd, *J* = 17.1, 10.8 Hz, 1H), 5.40 (dd, *J* = 17.4, 1.8 Hz, 1H), 5.34 (dd, *J* = 10.5, 1.5 Hz, 1H), 3.90 (d, *J* = 5.4 Hz, 1H), 3.80-3.85 (m, 1H), 2.56 (s, 1H), 1.61-2.07 (m, 5H), 1.37 (s, 3H), 1.32 (s, 6H), 1.20-1.31 (m, 6H).

**<sup>13</sup>C NMR (75 MHz, CDCl<sub>3</sub>):**  $\delta$  142.7 (CH), 112.7 (CH<sub>2</sub>), 106.8 (C), 82.7 (CH), 81.9 (CH), 75.5 (C), 36.0 (CH), 31.4 (CH<sub>2</sub>), 30.2 (CH<sub>2</sub>), 27.0 (CH<sub>3</sub>), 26.8 (CH<sub>3</sub>), 26.3 (CH<sub>2</sub>), 25.6 (CH<sub>2</sub>), 25.2 (CH<sub>2</sub>), 24.8 (CH<sub>3</sub>).

**FTIR (KBr, neat):**  $\nu$  3552, 2893, 2926, 2852, 1614, 1450, 1045 cm<sup>-1</sup>.

**HRMS (ESI)** calcd. for C<sub>15</sub>H<sub>27</sub>O<sub>3</sub> (M+1) 255.1953, found 255.1960.

**((R)-2-((4R,5R)-5-cyclohexyl-2,2-dimethyl-1,3-dioxolan-4-yl)but-3-en-2-yloxy)triethylsilane (12a)**

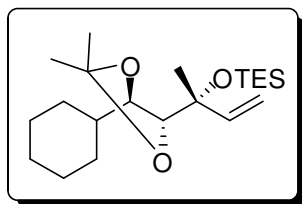

In a round bottom flask equipped with a rubber septum and a magnetic stirrer bar, alcohol **11a** (0.254 g, 1.00 mmol) was dissolved in  $\text{CH}_2\text{Cl}_2$  (2 mL). Then 2,6-lutidine (0.34 mL, 3.00 mmol) followed by TESOTf (0.32 mL, 1.50 mmol) was added to the reaction mixture at  $-78^\circ\text{C}$ . After stirring at  $-78^\circ\text{C}$  for 1h, the reaction mixture was quenched with water and the biphasic reaction mixture was extracted with diethyl ether (10 mL x 3). The combined organic extracts were dried over anhydrous sodium sulfate, filtered and concentrated *in vacuo*. The resulting residue was purified by flash chromatography (hexane/ $\text{Et}_2\text{O}$  10: 1) to afford the desired product as colorless oil (0.361 g, 98% yield).

**R<sub>f</sub> value (hexane/ $\text{Et}_2\text{O}$  8: 1):** 0.65.

$[\alpha]_{\text{D}}^{20} = -0.017$  ( $c = 1.0$ ,  $\text{CHCl}_3$ ).

**$^1\text{H}$  NMR (300 MHz,  $\text{CDCl}_3$ ):**  $\delta$  6.16 (dd,  $J = 10.8, 17.4$  Hz, 1H), 5.23 (dd,  $J = 1.7, 17.4$  Hz, 1H), 5.10 (dd,  $J = 1.7, 10.8$  Hz, 1H), 3.89-3.79 (m, 2H), 2.11-1.89 (m, 3H), 1.66-1.63 (m, 3H), 1.42 (s, 3H), 1.40 (s, 3H), 1.30 (s, 3H), 1.22-1.17 (m, 3H), 0.96 (t,  $J = 7.9$  Hz, 9H), 0.98-0.93 (m, 2H), 0.62 (q,  $J = 7.9$  Hz, 6H).

**$^{13}\text{C}$  NMR (100 MHz,  $\text{CDCl}_3$ ):**  $\delta$  142.0 (CH), 113.2 ( $\text{CH}_2$ ), 106.4 (C), 83.6 (CH), 83.3 (CH), 77.4 (C), 35.5 (CH), 31.6 ( $\text{CH}_2$ ), 30.3 ( $\text{CH}_2$ ), 26.9 ( $\text{CH}_2$ ), 26.9 ( $\text{CH}_2$ ), 26.6 ( $\text{CH}_2$ ), 25.7 ( $\text{CH}_3$ ), 25.7 ( $\text{CH}_3$ ), 25.1 ( $\text{CH}_3$ ), 7.2 ( $\text{CH}_2$ ), 6.8 ( $\text{CH}_3$ ).

**FTIR (NaCl, neat):**  $\nu$  2922, 1639, 1379, 1368, 1215, 1249, 872, 743  $\text{cm}^{-1}$ .

**HRMS (ESI) calcd.** for  $\text{C}_{21}\text{H}_{41}\text{O}_3\text{Si}$  ( $\text{M}+1$ ) 369.2825, found 369.2813.

**(4*R*,5*R*)-4-cyclohexyl-5-((*R*)-2-(4-methoxybenzyloxy)but-3-en-2-yl)-2,2-dimethyl-1,3-dioxolane (12b)**

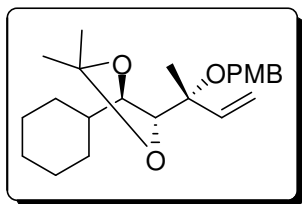

To an oven-dried round bottom flask equipped with a rubber septum and a magnetic stirrer bar was added sodium hydride (0.080 g, 60% dispersion in oil, 2.00 mmol) and anhydrous DMF (1 mL). The reaction mixture was cooled to 0 °C. A solution of alcohol **11a** (0.254 g, 1.00 mmol) in DMF (1 mL) was added dropwise and stirred for half an hour at 0 °C. Subsequently, PMBCl (0.188 g, 1.20 mmol) was introduced and the reaction mixture was allowed to proceed at room temperature for 12 h. The mixture was quenched by pouring the reaction mixture into ice water slowly with stirring. The mixture was then extracted with diethyl ether (10 mL x 3). The combined organic extracts were dried over anhydrous sodium sulfate, filtered and concentrated *in vacuo*. The resulting residue was purified by flash chromatography (hexane/Et<sub>2</sub>O 40: 1) to afford the desired product as needle-shaped crystal (0.337 g, 90% yield).

**R<sub>f</sub> value (hexane/Et<sub>2</sub>O 8: 1):** 0.32.

$[\alpha]_D^{20} = +7.5$  ( $c = 1.1$ , CHCl<sub>3</sub>).

**<sup>1</sup>H NMR (400 MHz, CDCl<sub>3</sub>):**  $\delta$  7.22 (d,  $J = 8.4$  Hz, 1H), 6.84 (d,  $J = 8.4$  Hz, 1H), 6.19 (dd,  $J = 17.6, 5.2$  Hz, 1H), 5.35 (ddd,  $J = 24.0, 10.8, 1.2$  Hz, 1H), 4.28 (s, 2H), 3.99 (d,  $J = 5.6$  Hz, 1H), 3.80-3.82 (m, 4H), 1.48-2.06 (m, 5H), 1.43 (s, 3H), 1.42 (s, 3H), 0.77-1.37 (m, 9H).

**<sup>13</sup>C NMR (100 MHz, CDCl<sub>3</sub>):**  $\delta$  158.9 (C), 139.5 (CH), 131.4 (C), 129.4 (CH), 117.8 (CH<sub>2</sub>), 113.6 (CH), 106.6 (C), 83.2 (CH), 82.6 (C), 80.1 (CH), 64.3 (CH<sub>2</sub>), 55.3 (CH<sub>3</sub>), 36.3 (CH), 31.4 (CH<sub>2</sub>), 30.5 (CH<sub>2</sub>), 26.9 (CH<sub>3</sub>), 26.5 (CH<sub>3</sub>), 25.8 (CH<sub>2</sub>), 25.2 (CH<sub>2</sub>), 25.1 (CH<sub>2</sub>), 20.1 (CH<sub>3</sub>).

**FTIR (KBr, neat):**  $\nu$  3007, 2927, 2852, 1612, 1857, 1369, 1053, 767 cm<sup>-1</sup>.

**HRMS (ESI)** calcd. for C<sub>23</sub>H<sub>35</sub>O<sub>4</sub> (M+1) 375.2519, found 375.2535.

**(S)-methyl 2-(tert-butyldimethylsilyloxy)propanoate (14)**

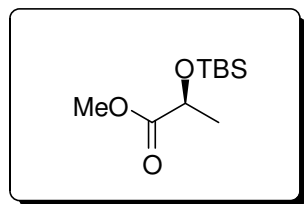

To a round bottom flask equipped with a rubber septum and a magnetic stirrer bar was added imidazole (0.136 g, 2.00 mmol) and  $\text{CH}_2\text{Cl}_2$  (2 mL). Then alcohol **13** (0.104 g, 1.00 mmol) was added dropwise and the reaction mixture was cooled to 0 °C. *Tert*-butylchlorodimethylsilane (0.226 g, 1.50 mmol) was added slowly and the resulting reaction mixture was stirred overnight at room temperature. The mixture was diluted with  $\text{CH}_2\text{Cl}_2$  (10 mL),  $\text{H}_2\text{O}$  (10 mL) and extracted with  $\text{CH}_2\text{Cl}_2$  (20 mL x 3). The combined organic extracts were dried over anhydrous sodium sulfate, filtered and concentrated *in vacuo*. The resulting residue was purified by flash chromatography (hexane/EtOAc 50: 1) to afford the desired product as pale yellow oil (0.216 g, 99% yield).

**R<sub>f</sub> value (hexane/EtOAc 9: 1):** 0.55.

$[\alpha]_{\text{D}}^{20} = -0.029$  ( $c = 1.0$ ,  $\text{CHCl}_3$ ).

**$^1\text{H}$  NMR (300 MHz,  $\text{CDCl}_3$ ):**  $\delta$  4.32 (q,  $J = 6.7$  Hz, 1H), 3.70 (s, 3H), 1.38 (d,  $J = 6.8$  Hz, 3H), 0.88 (s, 9H), 0.08 (s, 3H), 0.05 (s, 3H).

**$^{13}\text{C}$  NMR (75 MHz,  $\text{CDCl}_3$ ):**  $\delta$  174.5 (C), 68.4 (CH), 51.7 ( $\text{CH}_3$ ), 25.6 ( $\text{CH}_3$ ), 21.3 ( $\text{CH}_3$ ), 18.3 (C), -5.0 ( $\text{CH}_3$ ), -5.3 ( $\text{CH}_3$ ).

**FTIR (NaCl, neat):**  $\nu$  2953, 1759, 1740, 1373, 1362, 1148  $\text{cm}^{-1}$ .

**HRMS (ESI)** calcd. for  $\text{C}_{10}\text{H}_{23}\text{O}_3\text{Si}$  ( $\text{M}+1$ ) 219.1416, found 219.1419.

**(*S,E*)-methyl 4-(*tert*-butyldimethylsilyloxy)pent-2-enoate (**15**)**

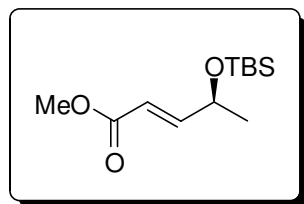

In a round bottom flask equipped with a rubber septum and a magnetic stirrer bar, the ester **14** (0.218 g, 1.00 mmol) was dissolved in hexane (1.0 mL) and cooled to -78 °C. DIBAL-H (pre-cooled to -78 °C, 1.1 mL, 1.0 M in heptane, 1.1 mmol) was added carefully over at least 2 portions. After stirring for another 1 h, MeOH (pre-cooled to -78 °C, 0.096 g, 3.3 mmol) was added carefully over 2 portions and stirred for a further half an hour until a white suspension was observed. The ylide MeO<sub>2</sub>CCH=PPh<sub>3</sub> (0.669 g, 2.00 mmol) was added in one portion followed by THF (5.0 mL) and the reaction mixture was allowed to warm slowly to room temperature over 30 minutes. The reaction mixture was stirred for another 30 minutes and refluxed for an additional 6 h. After that, the reaction mixture was cooled to room temperature and diluted with Et<sub>2</sub>O (5 mL) and saturated potassium sodium tartrate (5 mL). The mixture was stirred until a clear biphasic separation was observed. The aqueous layer was extracted with Et<sub>2</sub>O (10 mL x 3). The combined organic extracts were washed with saturated NaHCO<sub>3</sub> (15 mL x 2), brine (15 mL x 1) and dried over anhydrous sodium sulfate, filtered and concentrated *in vacuo*. The resulting residue was purified by flash chromatography (hexane/EtOAc 100: 1) to afford the desired *trans*-product as colorless oil (0.169 g, 69% yield; 88% total yield for the mixture of *E/Z* isomers, *E/Z* = 78: 22).

**R<sub>f</sub> value (hexane/EtOAc 10: 1):** 0.54.

$[\alpha]_D^{20} = +0.001$  ( $c = 1.0$ , CHCl<sub>3</sub>).

**<sup>1</sup>H NMR (400 MHz, CDCl<sub>3</sub>):**  $\delta$  6.93 (dd,  $J = 4, 15.5$  Hz, 1H), 5.99 (dd,  $J = 1.4, 15.2$  Hz, 1H), 4.46-4.43 (m, 1H), 3.72 (s, 3H), 1.25 (d,  $J = 6.6$  Hz, 3H), 0.90 (s, 9H), 0.06 (s, 3H), 0.05 (s, 3H).

**<sup>13</sup>C NMR (100 MHz, CDCl<sub>3</sub>):**  $\delta$  167.2 (C), 152.2 (CH), 118.5 (CH), 67.6 (CH), 51.5 (CH<sub>3</sub>), 25.8 (CH<sub>3</sub>), 23.5 (CH<sub>3</sub>), 18.2 (C), -4.9 (CH<sub>3</sub>).

**FTIR (NaCl, neat):**  $\nu$  2930, 1715, 1659, 1368, 1152, 837, 775 cm<sup>-1</sup>.

**HRMS (ESI)** calcd. for C<sub>12</sub>H<sub>24</sub>O<sub>3</sub>SiNa (M+Na) 267.1392, found 267.1394.

**(3*S*,4*S*)-methyl 4-(*tert*-butyldimethylsilyloxy)-3-methylpentanoate (16)**

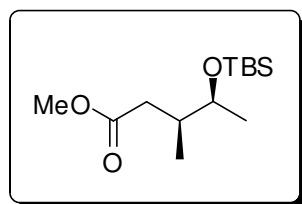

In a round bottom flask equipped with a rubber septum and a magnetic stirrer bar, (*R*)-Tol-BINAP (0.020 g, 0.03 mmol) and CuI (0.004 g, 0.02 mmol) were stirred in CH<sub>2</sub>Cl<sub>2</sub> (2 mL) for 20 minutes, concentrated *in vacuo* and then stirred in *t*-BuOMe (4 mL) till a bright yellow suspension was observed. The mixture was then cooled to -20 °C and MeMgBr (0.83 mL, 3.0 M solution in Et<sub>2</sub>O, 2.50 mmol) was added carefully into the reaction mixture. After stirring for 15 minutes, a pre-cooled solution of ester **15** (0.244 g, 1.00 mmol) in *t*-BuOMe (1.2 mL) was added dropwise over 1 h via syringe pump. After stirring at -20 °C for another one and an half hour, the reaction mixture was quenched with MeOH (1 mL), and 1 M NH<sub>4</sub>Cl solution (4 mL). The aqueous layer was extracted with Et<sub>2</sub>O (15 mL x 3) and the combined organic extracts were dried over anhydrous sodium sulfate, filtered and concentrated *in vacuo*. The resulting residue was purified by flash chromatography (hexane/Et<sub>2</sub>O 90: 1) to afford the desired product as pale yellow oil (0.164 g, 63% yield; 94% *de*).

**R<sub>f</sub> value (hexane/Et<sub>2</sub>O 8: 1): 0.27.**

$[\alpha]_D^{20} = +0.012$  ( $c = 0.65$ , CHCl<sub>3</sub>).

**<sup>1</sup>H NMR (300 MHz, CDCl<sub>3</sub>):**  $\delta$  3.79-3.76 (m, 1H), 3.66 (s, 3H), 2.48 (dd,  $J = 4.7, 14.5$  Hz, 1H), 2.13-2.00 (m, 2H), 1.06 (d,  $J = 6.3$  Hz, 3H), 0.88 (d,  $J = 4.9$  Hz, 3H) 0.88 (s, 9H), 0.04 (s, 3H), 0.03 (s, 3H).

**<sup>13</sup>C NMR (75 MHz, CDCl<sub>3</sub>):**  $\delta$  174.2 (C), 70.6 (CH), 51.4 (CH<sub>3</sub>), 37.3 (CH), 37.2 (CH<sub>2</sub>), 25.8 (CH<sub>3</sub>), 20.0 (CH<sub>3</sub>), 18.1 (C), 14.3 (CH<sub>3</sub>), -4.3 (CH<sub>3</sub>), -5.0 (CH<sub>3</sub>).

**FTIR (NaCl, neat):**  $\nu$  2930, 1742, 1381, 1252, 1038 cm<sup>-1</sup>.

**HRMS (ESI)** calcd. for C<sub>13</sub>H<sub>29</sub>O<sub>3</sub>Si (M+1) 261.1886, found 261.1886.



**(3S,4S)-4-(tert-butyldimethylsilyloxy)-3-methylpentanal (17)**

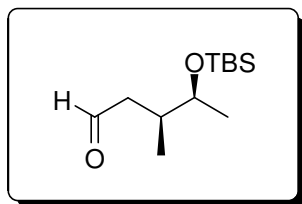

In a round bottom flask equipped with a rubber septum and a magnetic stirrer bar, the ester **16** (0.260 g, 1.00 mmol) was dissolved in hexane (4 mL) and cooled to -78 °C. DIBAL-H (pre-cooled to -78°C, 1.1 mL, 1.0 M in heptane, 1.10 mmol) was added carefully over at least 2 portions. After stirring for another 1 h, MeOH (pre-cooled to -78 °C, 0.106 g, 3.30 mmol) was added carefully over 2 portions and stirred for a further 15 minutes till a white suspension was observed. The reaction mixture was then added saturated potassium sodium tartrate solution (5 mL), diluted with Et<sub>2</sub>O (5 mL) and warmed to room temperature. The mixture was stirred until a clear biphasic separation was observed. The aqueous layer was extracted with Et<sub>2</sub>O (10 mL x 3). The combined organic extracts were washed with saturated NaHCO<sub>3</sub> (15 mL x 2), brine (15 mL x 1) and dried over anhydrous sodium sulfate, filtered and concentrated *in vacuo*. The resulting residue was purified by flash chromatography (hexane/Et<sub>2</sub>O 20: 1) to afford the desired product as pale yellow oil (0.200 g, 87% yield).

**R<sub>f</sub> value (hexane/Et<sub>2</sub>O 8: 1): 0.36.**

**<sup>1</sup>H NMR (400 MHz, CDCl<sub>3</sub>):** δ 9.76 (m, 1H), 3.80-3.77 (m, 1H), 2.61-2.53 (m, 1H), 2.22-2.17 (m, 2H), 1.06 (d, *J* = 6.3 Hz, 3H), 0.9 (d, *J* = 6.5 Hz, 3H), 0.87 (s, 9H), 0.04 (s, 3H), 0.03 (s, 3H).

**(3*S*,4*S*,6*S*,7*S*)-7-(*tert*-butyldimethylsilyloxy)-3,6-dimethyloct-1-en-4-ol (18)**

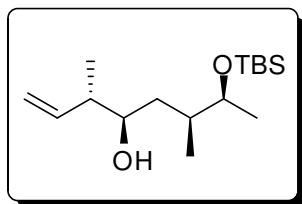

To a round bottom flask equipped with a rubber septum and a magnetic stirrer bar was added KO<sup>t</sup>Bu (1.5 mL, 1.0 M in THF, 1.50 mmol), dry THF (8 mL) and was allowed to cool to -78 °C. *Trans*-2-butene (0.168 g, 3.00 mmol) was condensed from a gas lecture bottle into the mixture at -78 °C. *n*-Butyllithium (0.94 mL, 1.6 M in hexane, 1.50 mmol) was then added dropwise. After complete addition of *n*-butyllithium, the mixture was stirred at -45 °C for 15 minutes. The resulting orange solution was re-cooled back to -78 °C, and to it was added a solution of (-)-methoxydiisopinocampheylborane (0.949 g, 3.00 mmol) in THF (3 mL). The solution became colorless. The reaction mixture was allowed to stir at -78 °C for 30 minutes followed by addition of boron trifluoride etherate (1.47 mL, 11.0 mmol). After that, a solution of aldehyde **17** in THF (1 mL) was added via a syringe pump over a period of 30 minutes. The mixture was allowed to stir at -78 °C for 3 h and then treated with 3 N NaOH solution (3 mL, 9 mmol) and 3 mL of 30% H<sub>2</sub>O<sub>2</sub> and the content was stirred for 15 minutes at room temperature. The aqueous layer was extracted with Et<sub>2</sub>O (15 mL x 3). The combined organic extracts were washed with brine (20 mL x 1) and dried over anhydrous sodium sulfate, filtered and concentrated *in vacuo*. The resulting residue was purified by flash chromatography (hexane/Et<sub>2</sub>O 40: 1) to afford the desired product as pale yellow oil (0.221 g, 77% yield; 84% *de*).

**R<sub>f</sub> value (hexane/Et<sub>2</sub>O 8: 1):** 0.23.

$[\alpha]_D^{20} = +0.007$  ( $c = 1.0$ , CHCl<sub>3</sub>).

**<sup>1</sup>H NMR (400 MHz, CDCl<sub>3</sub>):**  $\delta$  5.86-5.77 (m, 1H), 5.10-5.06 (m, 2H), 3.82-3.80 (m, 1H), 3.59-3.56 (m, 1H), 2.23-2.18 (m, 1H), 2.14 (d,  $J = 4.9$  Hz, 1H), 1.81-1.78 (m, 1H), 1.67-1.61 (m, 1H), 1.25-1.20 (m, 1H), 1.08 (d,  $J = 6.2$  Hz, 3H), 1.04 (d,  $J = 6.8$  Hz, 3H), 0.88 (s, 9H), 0.87 (d,  $J = 4.8$  Hz, 3H), 0.06 (s, 3H), 0.05 (s, 3H).

**<sup>13</sup>C NMR (100 MHz, CDCl<sub>3</sub>):**  $\delta$  140.5 (CH), 115.6 (CH<sub>2</sub>), 73.0 (CH), 71.4 (CH), 43.8 (CH), 37.1 (CH<sub>2</sub>), 36.5 (CH), 25.9 (CH<sub>3</sub>), 19.2 (CH<sub>3</sub>), 18.1 (C), 16.7 (CH<sub>3</sub>), 16.4 (CH<sub>3</sub>), -4.3 (CH<sub>3</sub>), -4.8 (CH<sub>3</sub>).

**FTIR (NaCl, neat):**  $\nu$  3381, 2959, 1639, 1377, 1043, 835, 773 cm<sup>-1</sup>.

**HRMS (ESI)** calcd. for C<sub>16</sub>H<sub>35</sub>O<sub>2</sub>Si (M+1) 287.2406, found 287.2401.

**(5*S*,6*S*,8*R*)-8-((*S*)-but-3-en-2-yl)-10,10-diethyl-2,2,3,3,5,6-hexamethyl-4,9-dioxo-3,10-disiladodecane (19)**

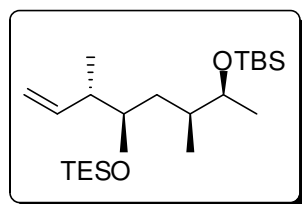

To a round bottom flask equipped with a rubber septum and a magnetic stirrer bar was added alcohol **18** (0.287 g, 1.00 mmol), dry pyridine (2 mL) and DMAP (0.024 g, 0.20 mmol). TESCl (0.301 g, 2.00 mmol) was then added and the reaction mixture was allowed to stir for 12 h at room temperature. After stirring for 12 h, the reaction mixture was added saturated NH<sub>4</sub>Cl solution (10 mL) and diluted with CH<sub>2</sub>Cl<sub>2</sub> (10 mL). The mixture was stirred until a clear biphasic separation was observed. Subsequently, the aqueous layer was extracted with CH<sub>2</sub>Cl<sub>2</sub> (10 mL x 3). The combined organic extracts were washed with brine (15 mL x 1) and dried over anhydrous sodium sulfate, filtered and concentrated *in vacuo*. The resulting residue was purified by flash chromatography (hexane/Et<sub>2</sub>O 100: 1) to afford the desired product as colorless oil (0.373 g, 93% yield).

**R<sub>f</sub> value (hexane):** 0.25.

$[\alpha]_{\text{D}}^{20} = +0.004$  ( $c = 1.0$ , CHCl<sub>3</sub>).

**<sup>1</sup>H NMR (300 MHz, CDCl<sub>3</sub>):**  $\delta$  5.89-5.77 (m, 1H), 5.03-4.98 (m, 2H), 3.72-3.65 (m, 2H), 2.35-2.30 (m, 1H), 1.60-1.55 (m, 1H), 1.48-1.45 (m, 1H), 1.10-1.20 (m, 1H), 1.08 (d,  $J = 6.2$  Hz, 3H), 1.05 (d,  $J = 6.9$  Hz, 3H), 0.98 (t,  $J = 7.9$  Hz, 9H), 0.90 (s, 9H), 0.87 (d,  $J = 6.8$  Hz, 3H), 0.62 (q,  $J = 7.9$  Hz, 6H), 0.05 (s, 3H), 0.04 (s, 3H).

**<sup>13</sup>C NMR (100 MHz, CDCl<sub>3</sub>):**  $\delta$  140.4 (CH), 114.6 (CH<sub>2</sub>), 74.3 (CH), 71.4 (CH), 42.7 (CH), 37.5 (CH<sub>2</sub>), 36.9 (CH), 25.9 (CH<sub>3</sub>), 21.0 (CH<sub>3</sub>), 18.1 (C), 16.3 (CH<sub>3</sub>), 14.6 (CH<sub>3</sub>), 7.0 (CH<sub>3</sub>), 5.3 (CH<sub>2</sub>), -4.1 (CH<sub>3</sub>), -4.8 (CH<sub>3</sub>).

**FTIR (NaCl, neat):**  $\nu$  3073, 2957, 1640, 1379, 1037, 835 cm<sup>-1</sup>.

**HRMS (ESI)** calcd. for C<sub>22</sub>H<sub>48</sub>O<sub>2</sub>Si<sub>2</sub>Na (M+Na) 423.3091, found 423.3148.

**(3S,4R,6S,7S)-7-(tert-butyldimethylsilyloxy)-3,6-dimethyl-4-(triethylsilyloxy)octan-1-ol (20)**

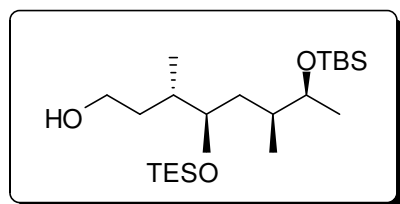

To a round bottom flask equipped with a rubber septum and a magnetic stirrer bar was added alkene **19** (1.202 g, 3.00 mmol). The flask was cooled to 0 °C and hydroboration was initiated by dropwise addition of BH<sub>3</sub>-THF (1.0 mL, 1.0 M in THF, 1.00 mmol) for 15 minutes. The mixture was stirred at room temperature for 2 h. After stirring for 2 h, the organoborane was dissolved in 5 mL of THF. A solution of 3 N NaOH (1.0 mL, 3.00 mmol) was added followed by the slow addition 1 mL of 30% of hydrogen peroxide aqueous solution. The reaction mixture was heated to 50 °C for 1 h to ensure completion of the oxidation. The mixture was saturated with potassium carbonate. The two phases were separated and extracted with Et<sub>2</sub>O (10 mL x 3). The combined organic extracts were washed with brine (15 mL x 1) and dried over anhydrous sodium sulfate, filtered and concentrated *in vacuo*. The resulting residue was purified by flash chromatography (hexane/Et<sub>2</sub>O 8: 1) to afford the desired product as colorless oil (0.967 g, 77% yield).

**R<sub>f</sub> value (hexane/Et<sub>2</sub>O 2: 1): 0.18.**

$[\alpha]_D^{20} = -0.005$  ( $c = 1.0$ , CHCl<sub>3</sub>).

**<sup>1</sup>H NMR (400 MHz, CDCl<sub>3</sub>):**  $\delta$  3.71-3.64 (m, 3H), 3.53 (m, 1H), 3.06 (m, 1H), 1.76-1.70 (m, 2H), 1.55-1.48 (m, 1H), 1.38 (m, 1H), 1.29-1.25 (m, 2H), 1.07 (d,  $J = 6.2$  Hz, 3H), 0.96 (d, 3H), 0.96 (t,  $J = 8.1$  Hz, 9H), 0.88 (s, 9H), 0.84 (d,  $J = 6.7$  Hz, 3H), 0.62 (q,  $J = 7.9$  Hz, 6H), 0.03 (s, 3H), 0.02 (s, 3H).

**<sup>13</sup>C NMR (75 MHz, CDCl<sub>3</sub>):**  $\delta$  74.8 (CH), 71.8 (CH), 59.0 (CH<sub>2</sub>), 37.2 (CH<sub>2</sub>), 37.1 (CH), 33.4 (CH), 32.7 (CH<sub>2</sub>), 25.6 (CH<sub>3</sub>), 20.5 (CH<sub>3</sub>), 18.1 (C), 16.3 (CH<sub>3</sub>), 14.3 (CH<sub>3</sub>), 6.9 (CH<sub>3</sub>), 5.1 (CH<sub>2</sub>), -4.2 (CH<sub>3</sub>), -4.8 (CH<sub>3</sub>).

**FTIR (NaCl, neat):**  $\nu$  3347, 2957, 1379, 1063 cm<sup>-1</sup>.

**HRMS (ESI) calcd. for C<sub>22</sub>H<sub>51</sub>O<sub>3</sub>Si<sub>2</sub> (M+1) 419.3377, 419.3369.**

**5-((3*S*,4*R*,6*S*,7*S*)-(*tert*-butyldimethylsilyloxy)-3,6-dimethyl-4-(triethylsilyloxy)octylthio)-1-phenyl-1*H*-tetrazole (21)**

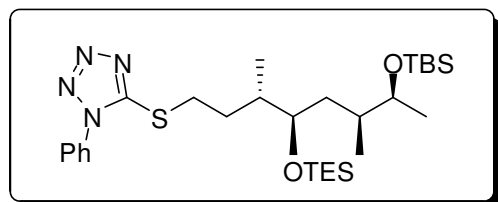

In a round bottom flask equipped with a rubber septum and a magnetic stirrer bar, triphenylphosphine (0.393 g, 1.50 mmol) and alcohol **20** (0.419 g, 1.00 mmol) were dissolved in THF (5 mL). DIAD (0.364 g, 1.80 mmol) was next added over 2 minutes at 0 °C resulting in yellow suspension. Subsequently, a solution of 1-phenyl-1*H*-tetrazole-5-thiol in THF (1 mL) was added over 5 minutes and the reaction mixture was warmed to room temperature. After stirring for 3 h, the reaction was quenched with brine (10 mL) and extracted with Et<sub>2</sub>O (10 mL x 3). The combined organic extracts were dried over anhydrous sodium sulfate, filtered and concentrated *in vacuo*. The resulting residue was purified by flash chromatography (hexane/Et<sub>2</sub>O 20: 1) to afford the desired product as colorless oil (0.498 g, 86% yield).

**R<sub>f</sub> value (hexane/Et<sub>2</sub>O 8: 1):** 0.21.

$[\alpha]_D^{20} = -0.014$  ( $c = 1.1$ , CHCl<sub>3</sub>).

**<sup>1</sup>H NMR (500 MHz, CDCl<sub>3</sub>):**  $\delta$  7.57-7.55 (m, 5H), 3.68-3.64 (m, 2H), 3.58-3.52 (m, 1H), 3.34-3.30 (m, 1H), 1.88-1.83 (m, 1H), 1.71-1.65 (m, 2H), 1.58-1.55 (m, 1H), 1.41-1.40 (m, 1H), 1.21-1.17 (m, 1H), 1.03 (d,  $J = 6.2$  Hz, 3H), 0.99 (d,  $J = 0.66$  Hz, 3H), 0.94 (t,  $J = 7.9$  Hz, 9H), 0.85 (s, 9H), 0.84 (d,  $J = 7.1$  Hz, 3H), 0.58 (q,  $J = 7.9$  Hz, 6H), 0.02 (s, 3H), -0.02 (s, 3H).

**<sup>13</sup>C NMR (125 MHz, CDCl<sub>3</sub>):**  $\delta$  154.4 (C), 133.4 (C), 130.0 (CH), 129.7 (CH), 123.8 (CH), 74.7 (CH), 71.4 (CH), 37.2 (CH), 36.6 (CH<sub>2</sub>), 36.4 (CH), 31.9 (CH<sub>2</sub>), 29.9 (CH<sub>2</sub>), 25.9 (CH<sub>3</sub>), 20.5 (CH<sub>3</sub>), 18.0 (C), 15.7 (CH<sub>3</sub>), 14.7 (CH<sub>3</sub>), 7.0 (CH<sub>2</sub>), 5.2 (CH<sub>3</sub>), -4.1 (CH<sub>3</sub>), -4.8 (CH<sub>3</sub>).

**FTIR (NaCl, neat):**  $\nu$  2955, 1599, 1500, 1383, 1084, 837, 760 cm<sup>-1</sup>.

**HRMS (ESI)** calcd. for C<sub>29</sub>H<sub>55</sub>N<sub>4</sub>O<sub>2</sub>SSi<sub>2</sub> (M+1) 579.3584, found 579.3567.

**(3*S*,4*R*,6*S*,7*S*)-7-(*tert*-butyldimethylsilyloxy)-3,6-dimethyl-1-(1-phenyl-1*H*-tetrazol-5-ylsulfonyl)octan-4-ol**  
**(22)**

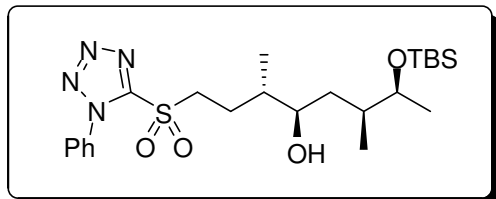

In a round bottom flask equipped with rubber a septum and a magnetic stirrer bar, thiol **21** (0.579 g, 1.00 mmol) was dissolved in EtOH (4 mL). A solution of hexaammonium heptamolybdate tetrahydrate (0.024 g, 0.10 mmol) in 2 mL of 30% hydrogen peroxide was added to the reaction mixture at room temperature and stirred overnight. The reaction was diluted with EtOAc, washed with water and brine. The organic extracts were dried over anhydrous sodium sulfate, filtered and concentrated *in vacuo*. The resulting residue was purified by flash chromatography (hexane/Et<sub>2</sub>O 2: 1) to afford the desired product as yellow oil (0.353 g, 71% yield).

**R<sub>f</sub> value (hexane/EtOAc 2: 1): 0.30.**

$$[\alpha]_{\text{D}}^{20} = +0.004 \text{ (} c = 1.0, \text{CHCl}_3 \text{)}.$$

**<sup>1</sup>H NMR (400 MHz, CDCl<sub>3</sub>):**  $\delta$  7.70-7.68 (m, 2H), 7.63-7.59 (m, 3H), 3.87-3.81 (m, 3H), 3.60-3.55 (m, 1H), 3.14 (d,  $J$  = 5.4 Hz, 1H), 2.23-2.17 (m, 1H), 1.95-1.86 (m, 2H), 1.70-1.56 (m, 2H), 1.40-1.30 (m, 1H), 1.08 (d,  $J$  = 6.3 Hz, 3H), 0.97 (d,  $J$  = 6.8 Hz, 3H), 0.89 (s, 9H), 0.88 (d,  $J$  = 5.8 Hz, 3H), 0.08 (s, 3H), 0.07 (s, 3H).

**<sup>13</sup>C NMR (100 MHz, CDCl<sub>3</sub>):** δ 153.5 (C), 133.1 (C), 131.4 (CH), 129.7 (CH), 125.1 (CH), 73.1 (CH), 72.5 (CH), 54.7 (CH<sub>2</sub>), 37.7 (CH), 36.9 (CH<sub>2</sub>), 35.8 (CH), 25.7 (CH<sub>3</sub>), 25.3 (CH<sub>2</sub>), 18.3 (CH<sub>3</sub>), 18.1 (C), 17.7 (CH<sub>3</sub>), 16.1 (CH<sub>3</sub>), -4.3 (CH<sub>3</sub>), -4.8 (CH<sub>3</sub>).

**FTIR (NaCl, neat):**  $\nu$  3418, 2957, 1595, 1499, 1339, 1152, 835, 773  $\text{cm}^{-1}$ .

**HRMS (ESI)** calcd. for C<sub>23</sub>H<sub>41</sub>N<sub>4</sub>O<sub>4</sub>Si (M+1) 496.2618, found 497.2618.

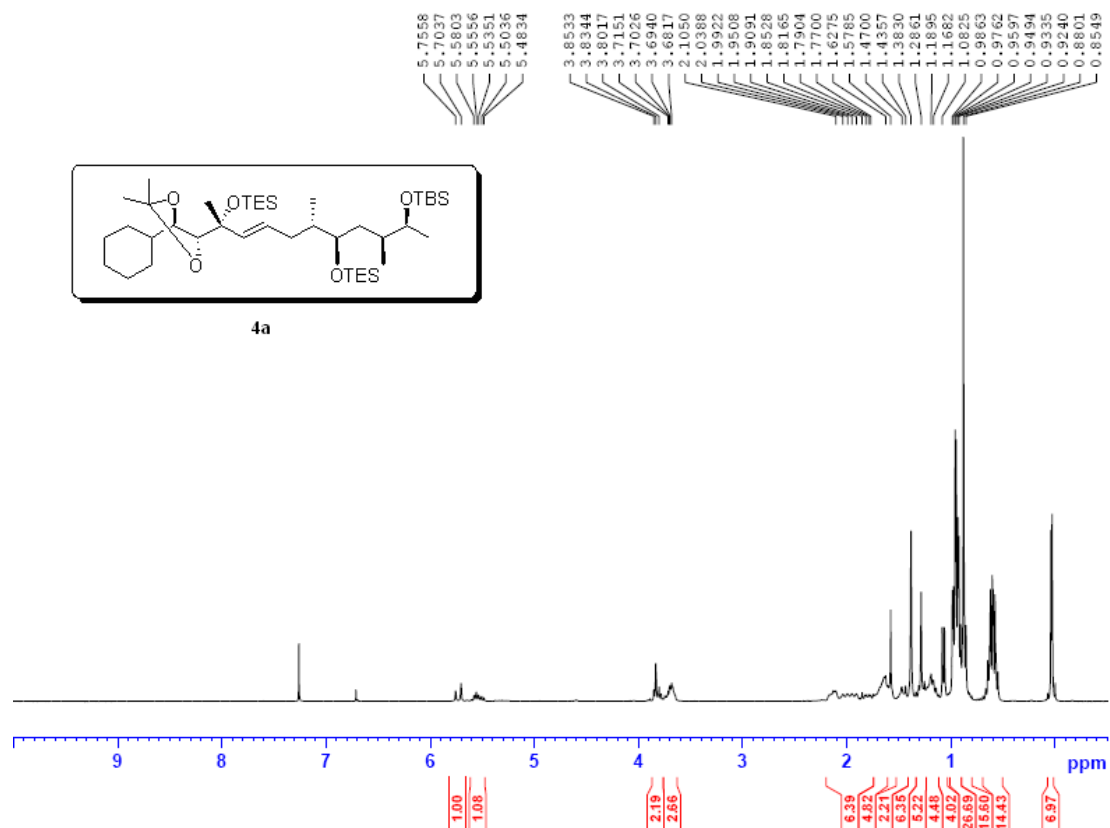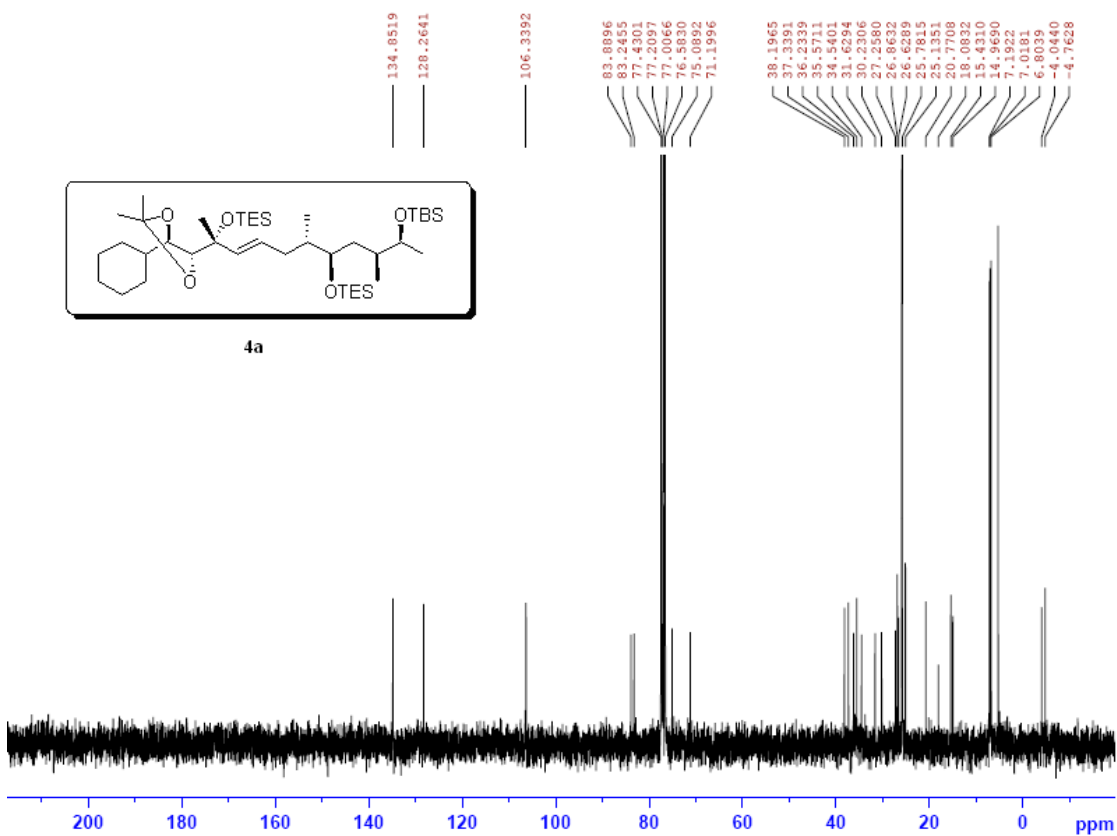

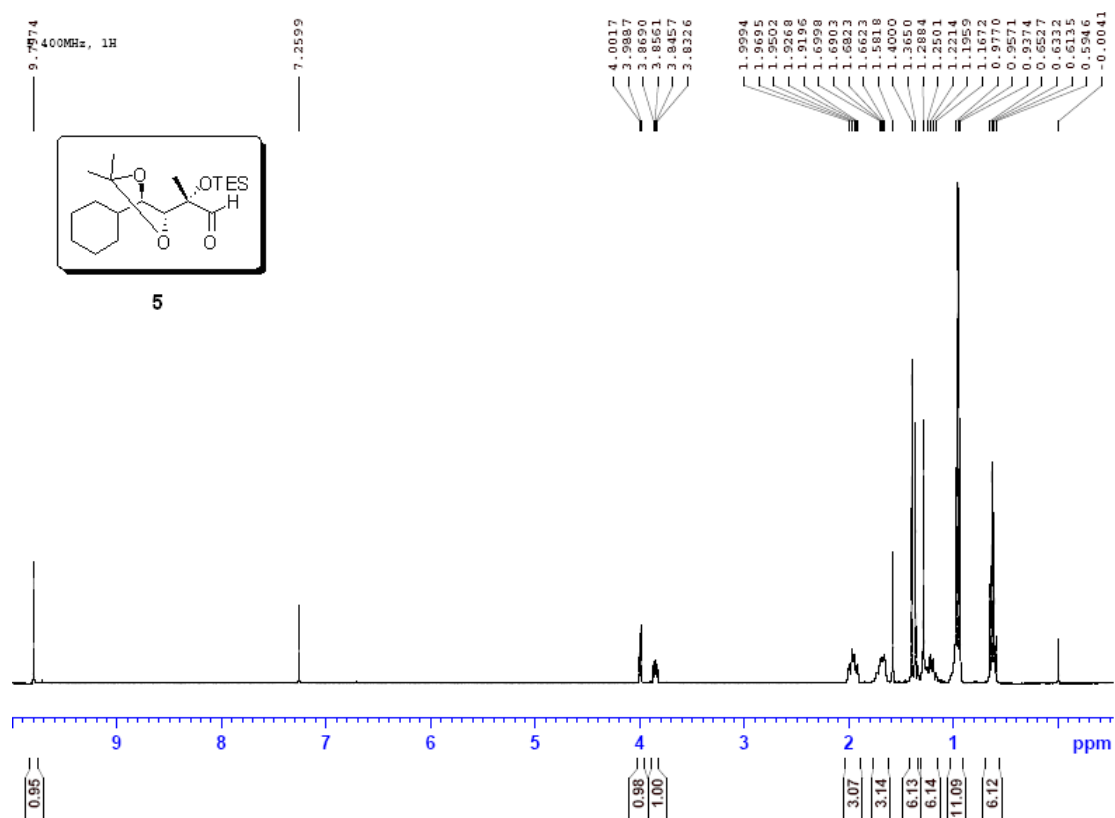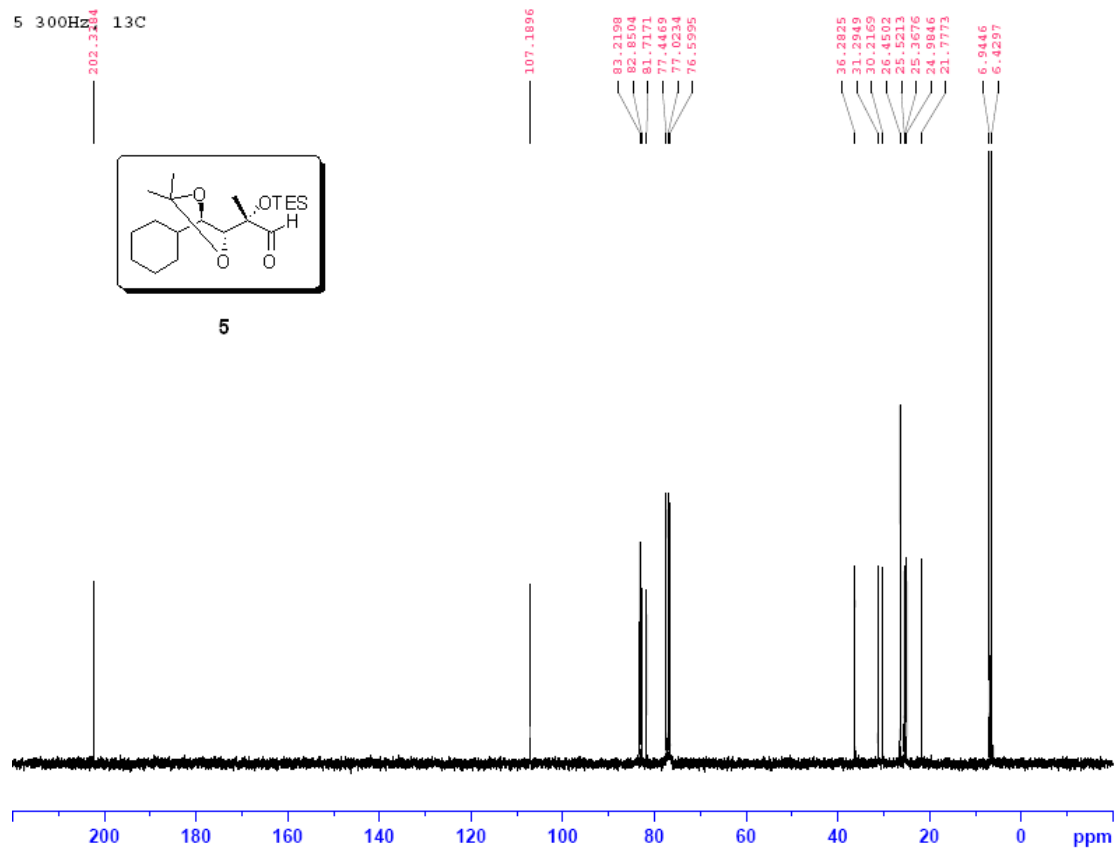



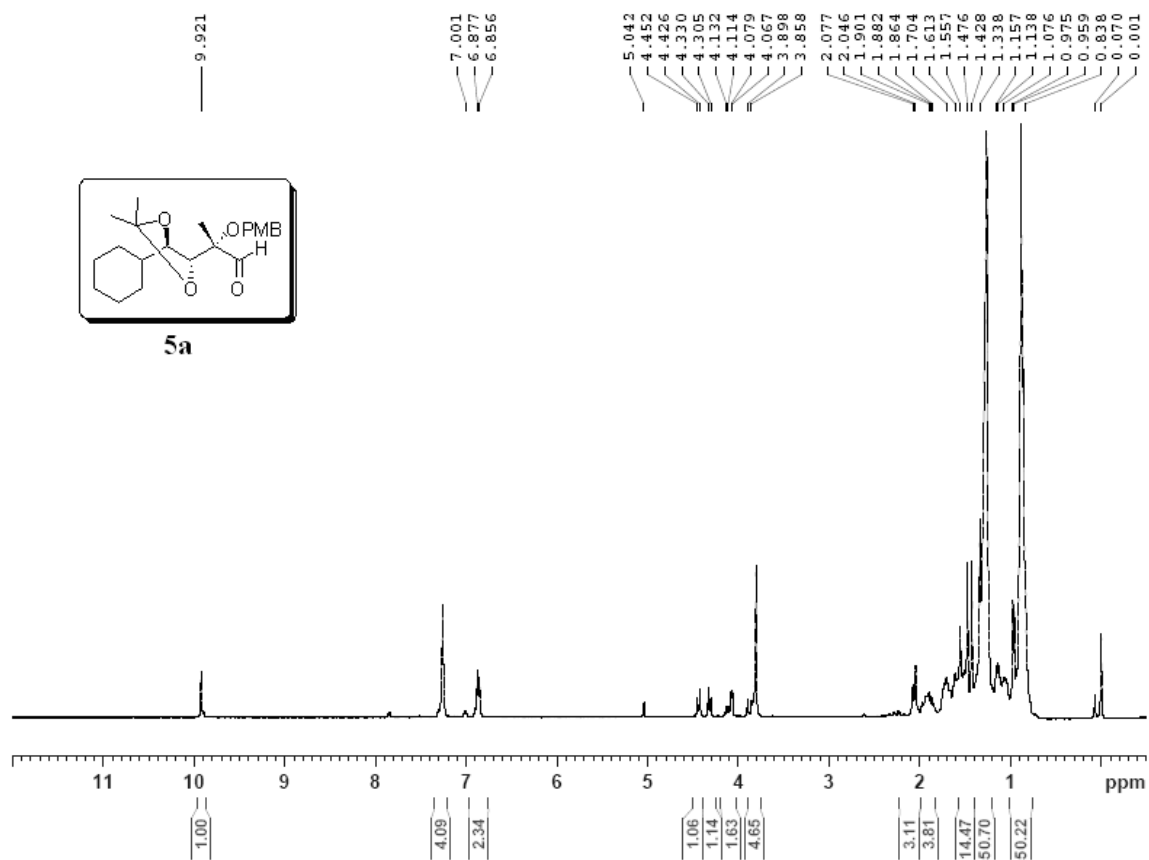

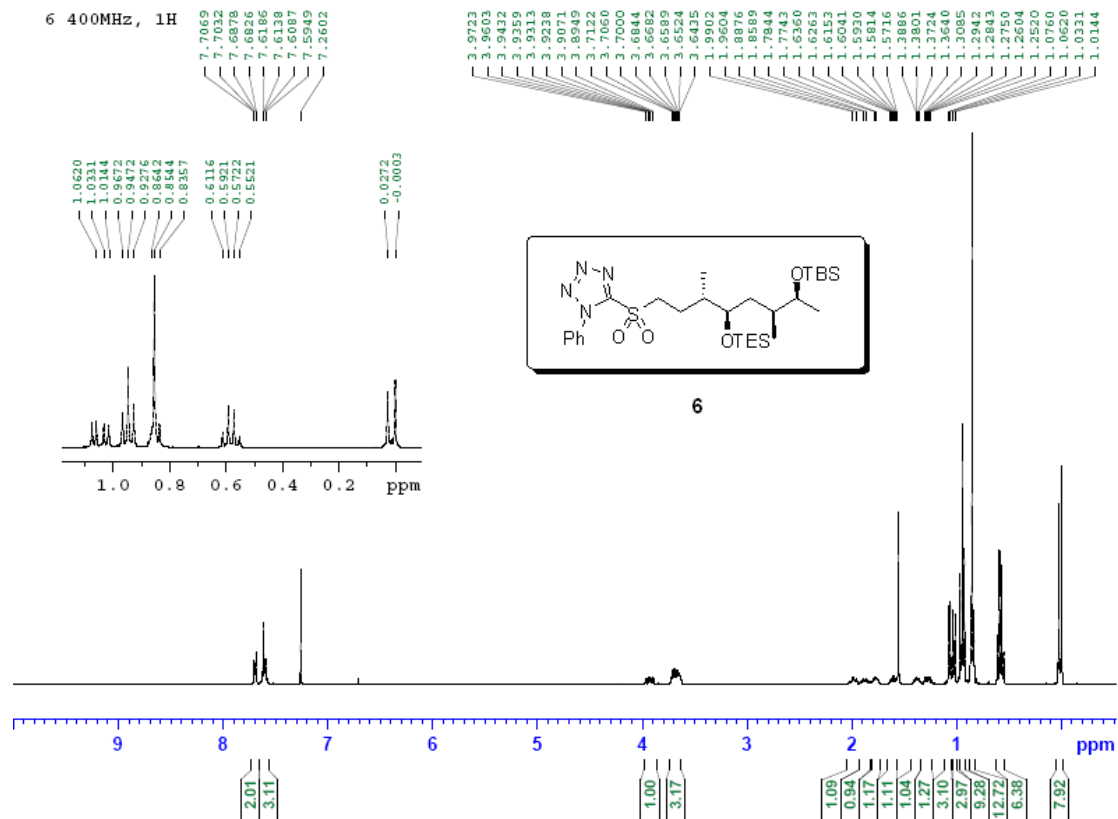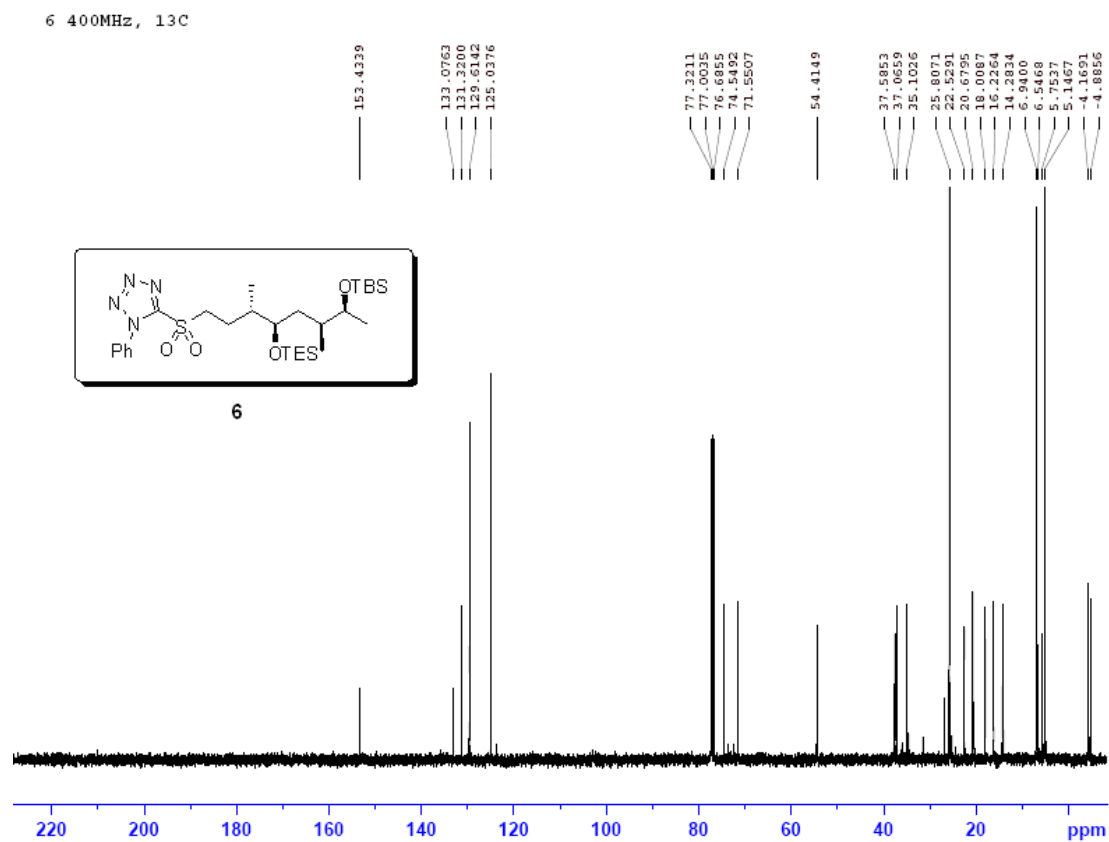

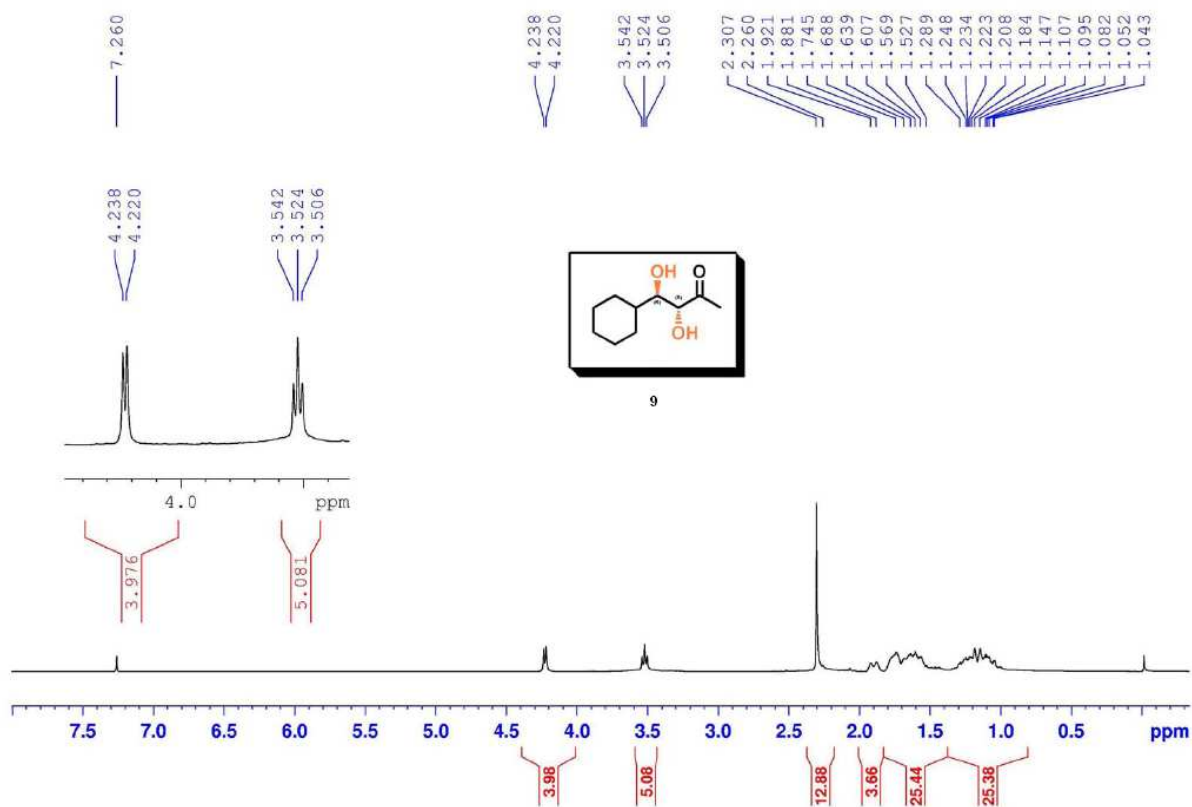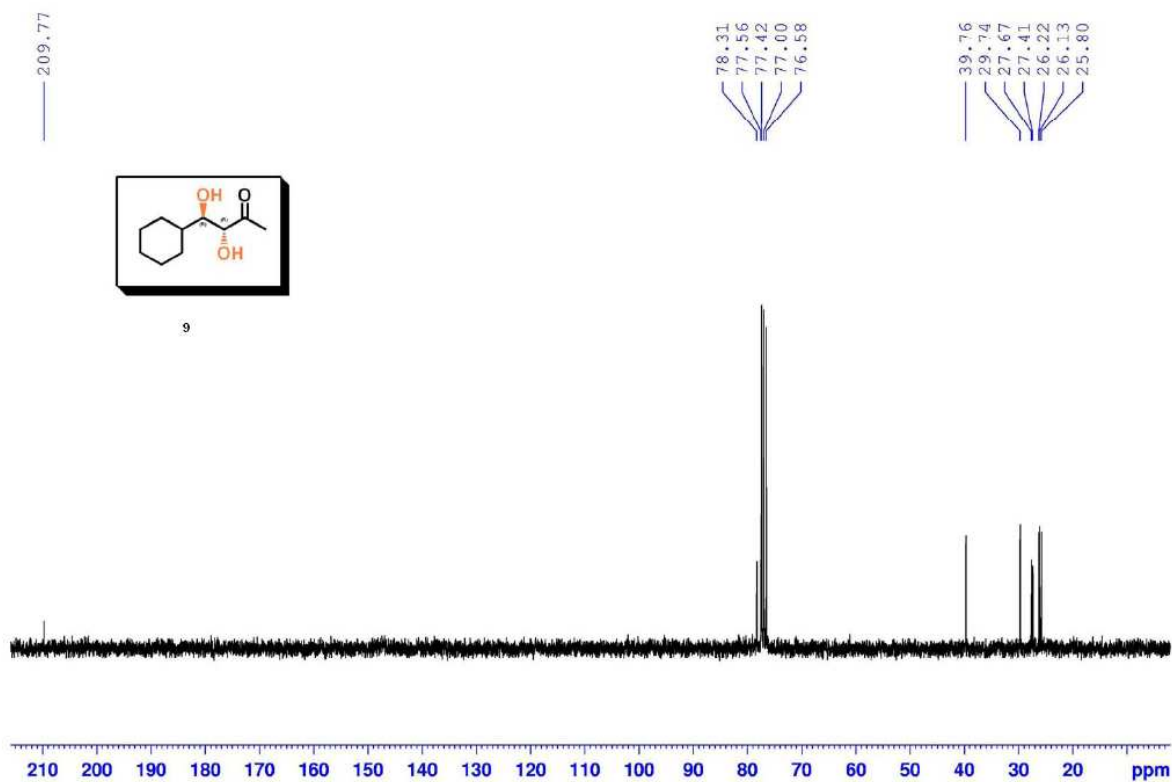

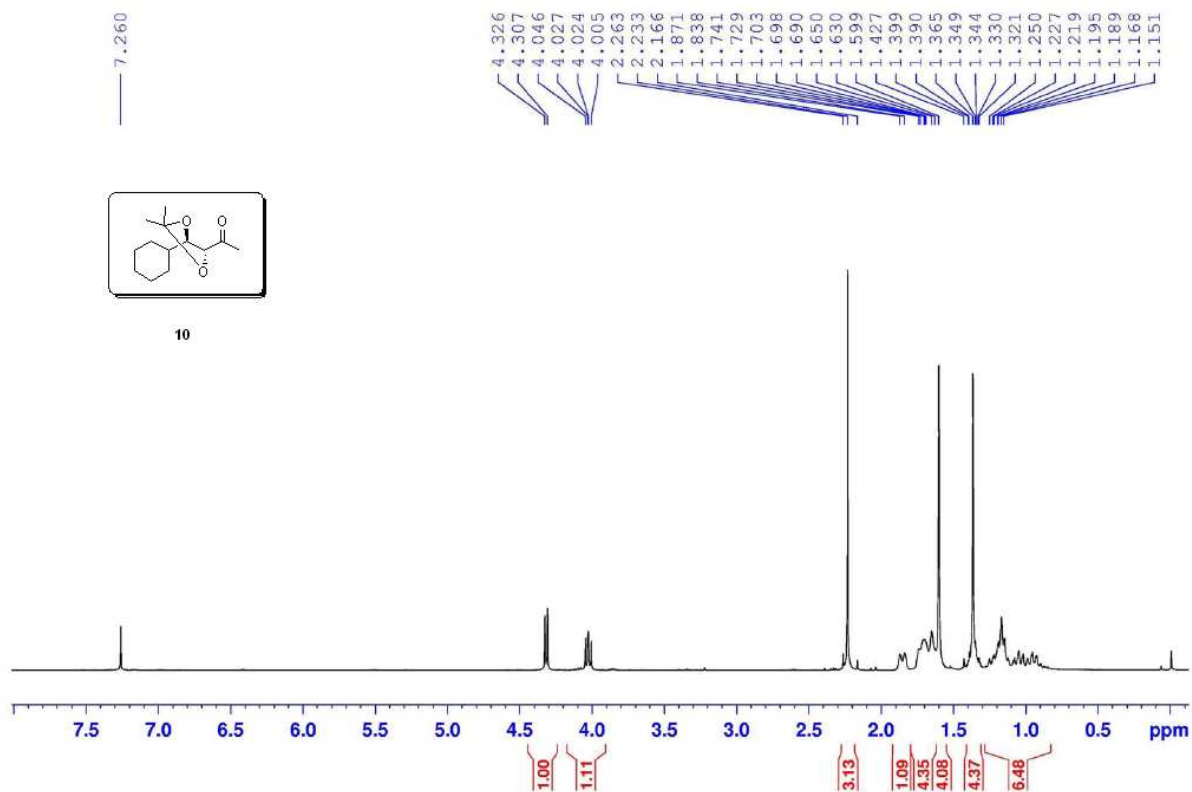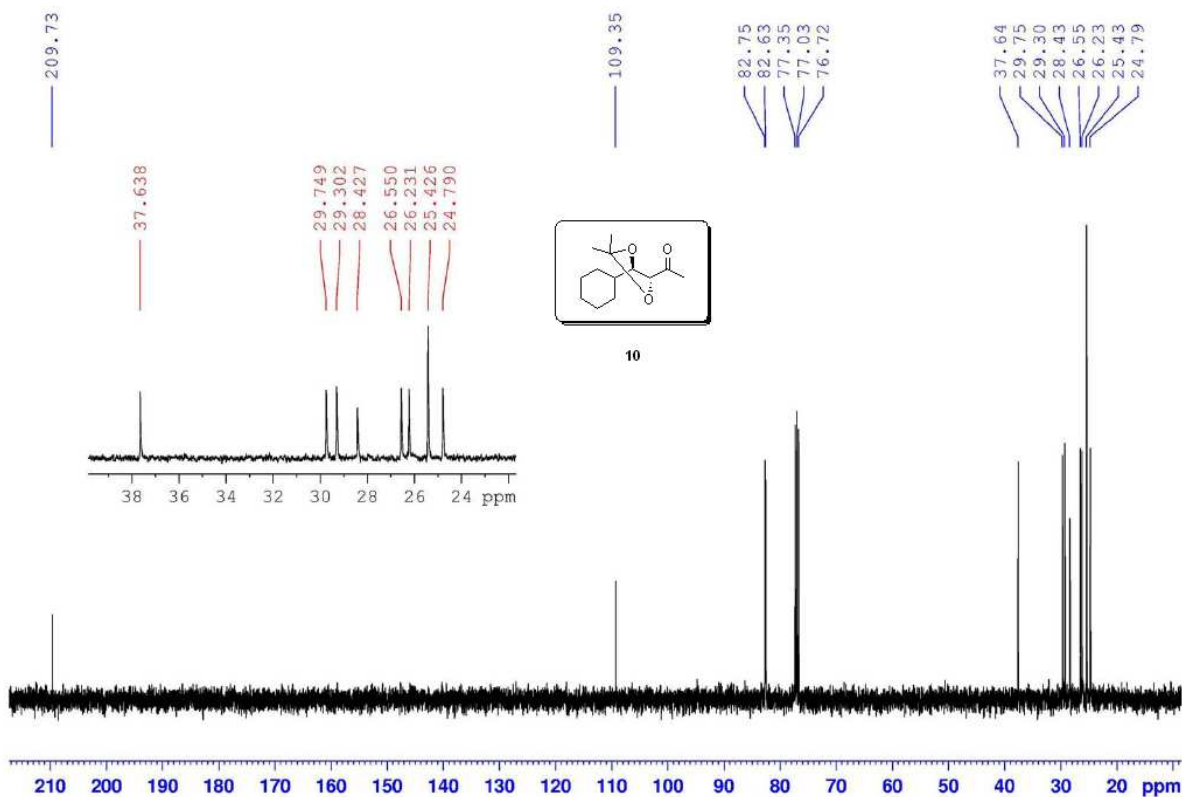

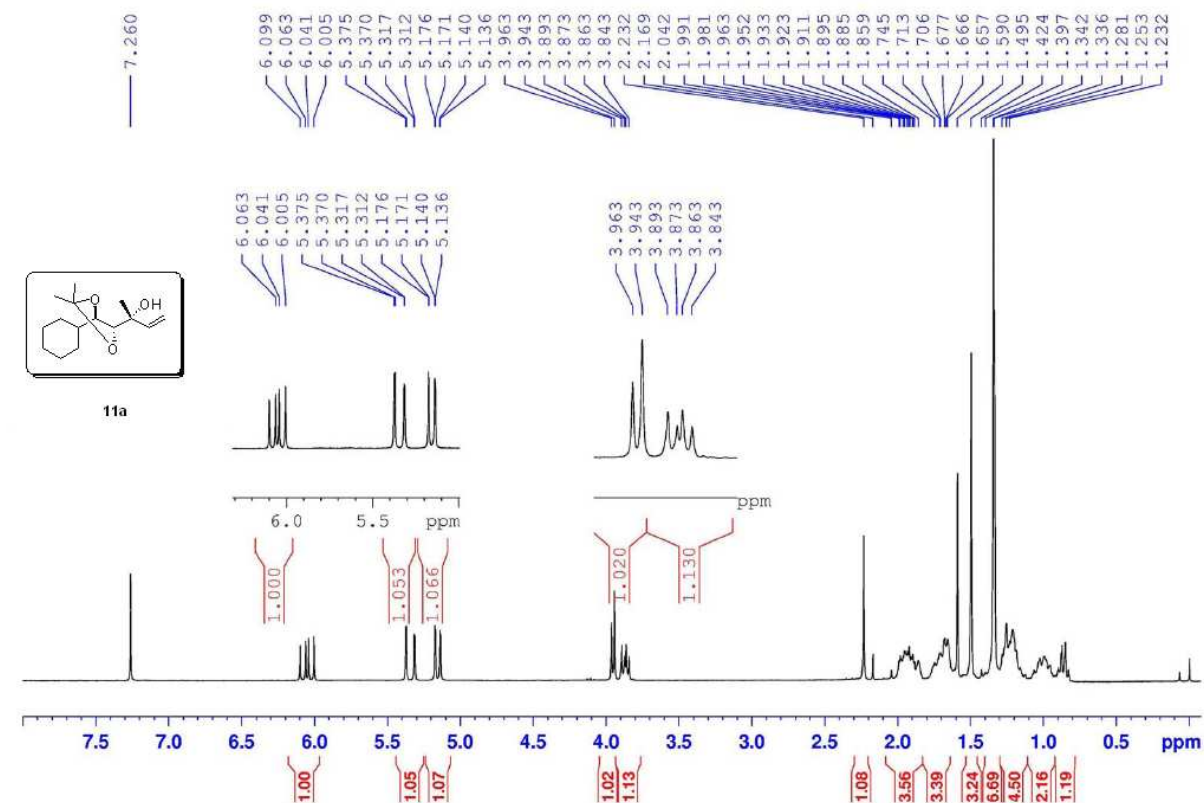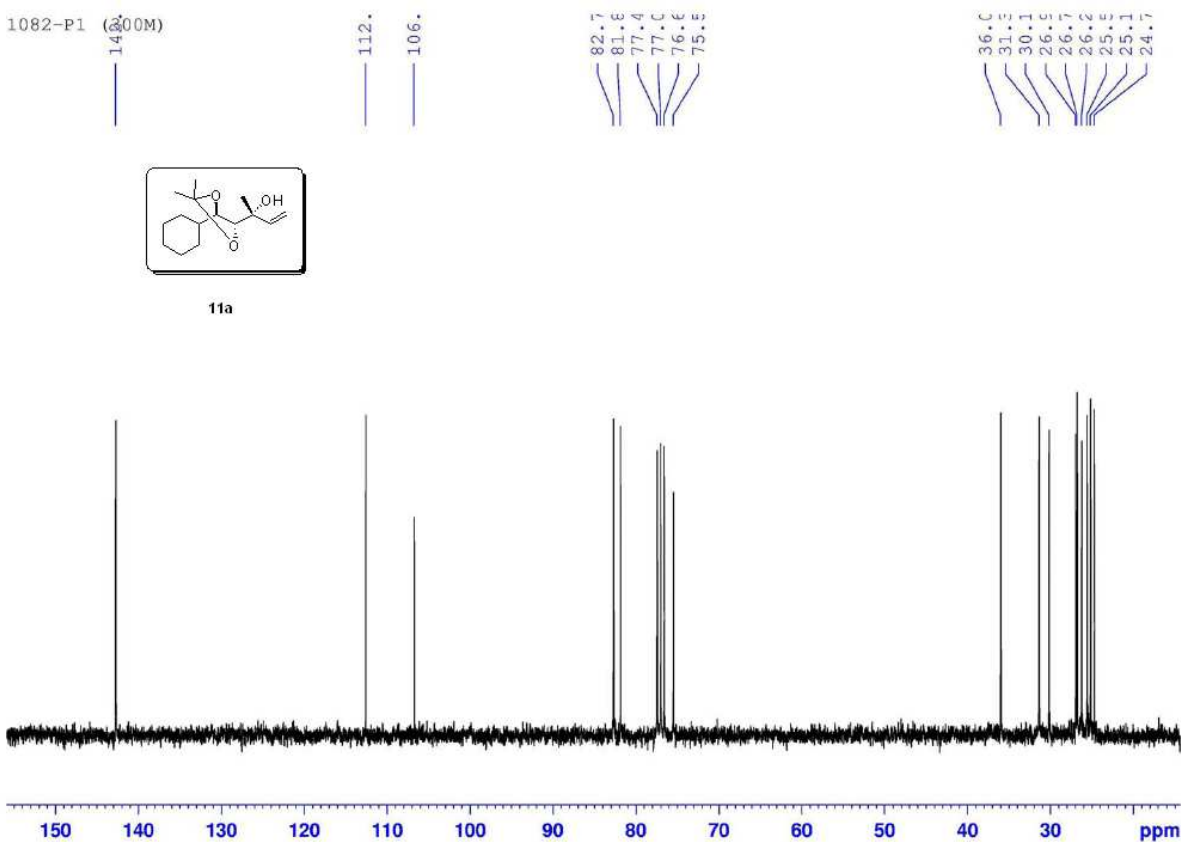

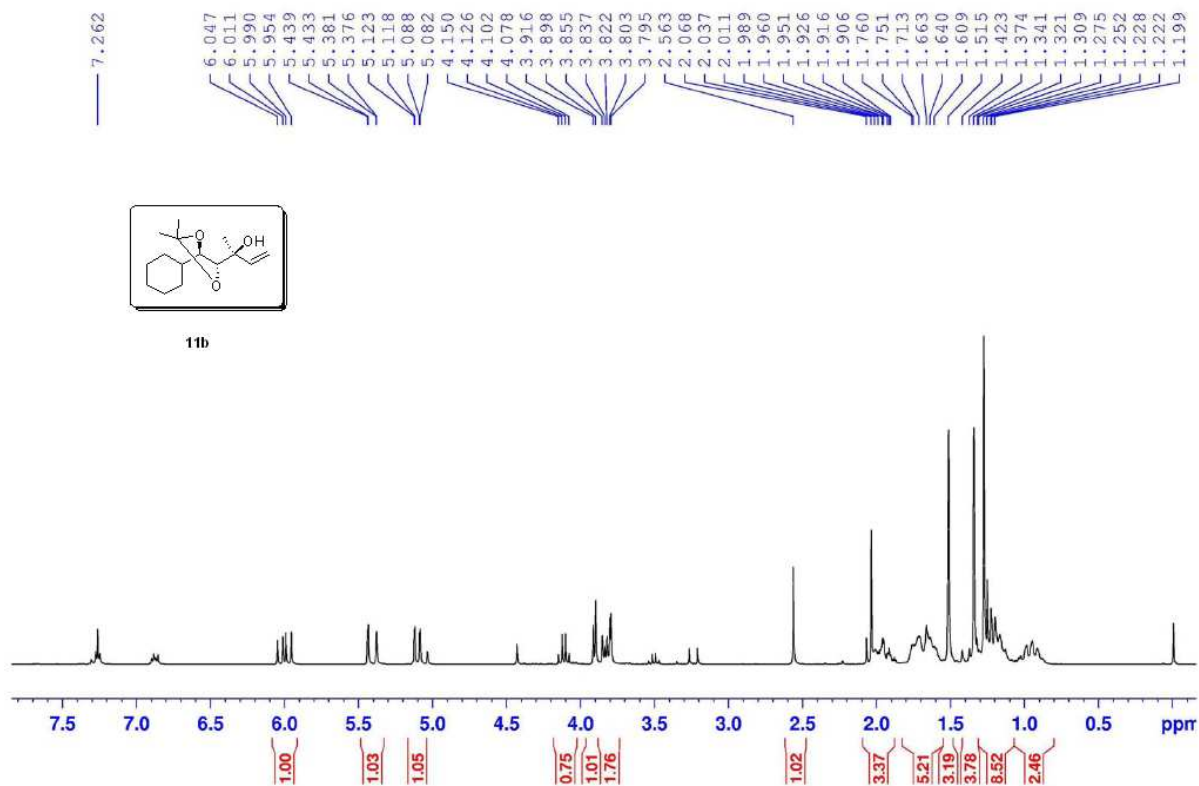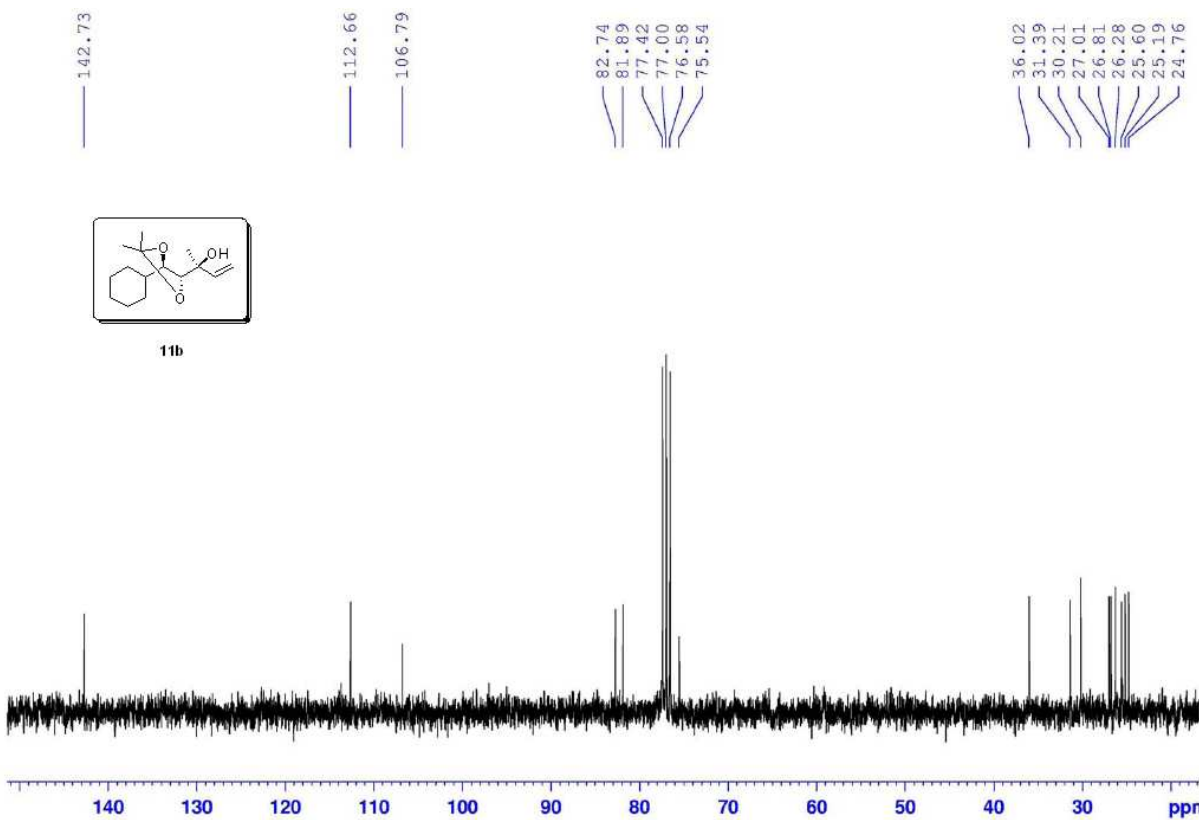

12a 300MHz, <sup>1</sup>H

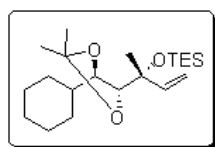

12a

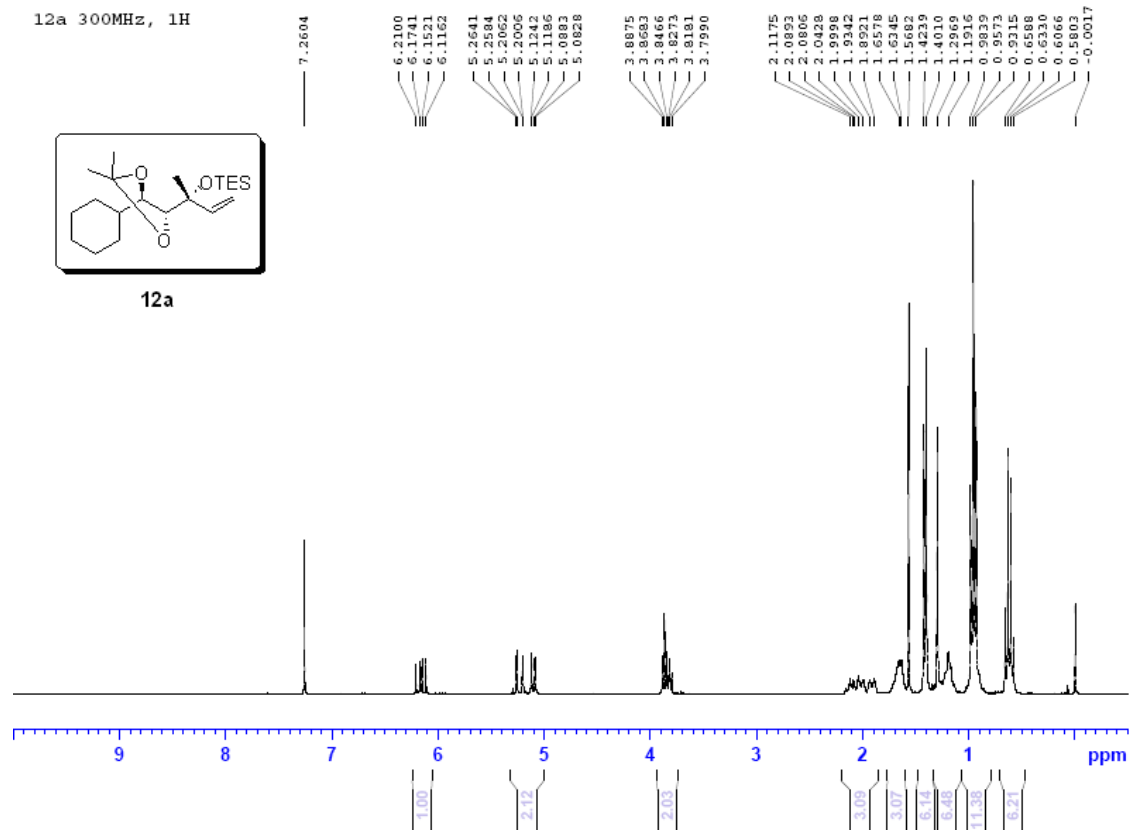

12a 400MHz, <sup>13</sup>C

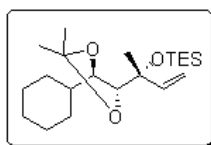

12a

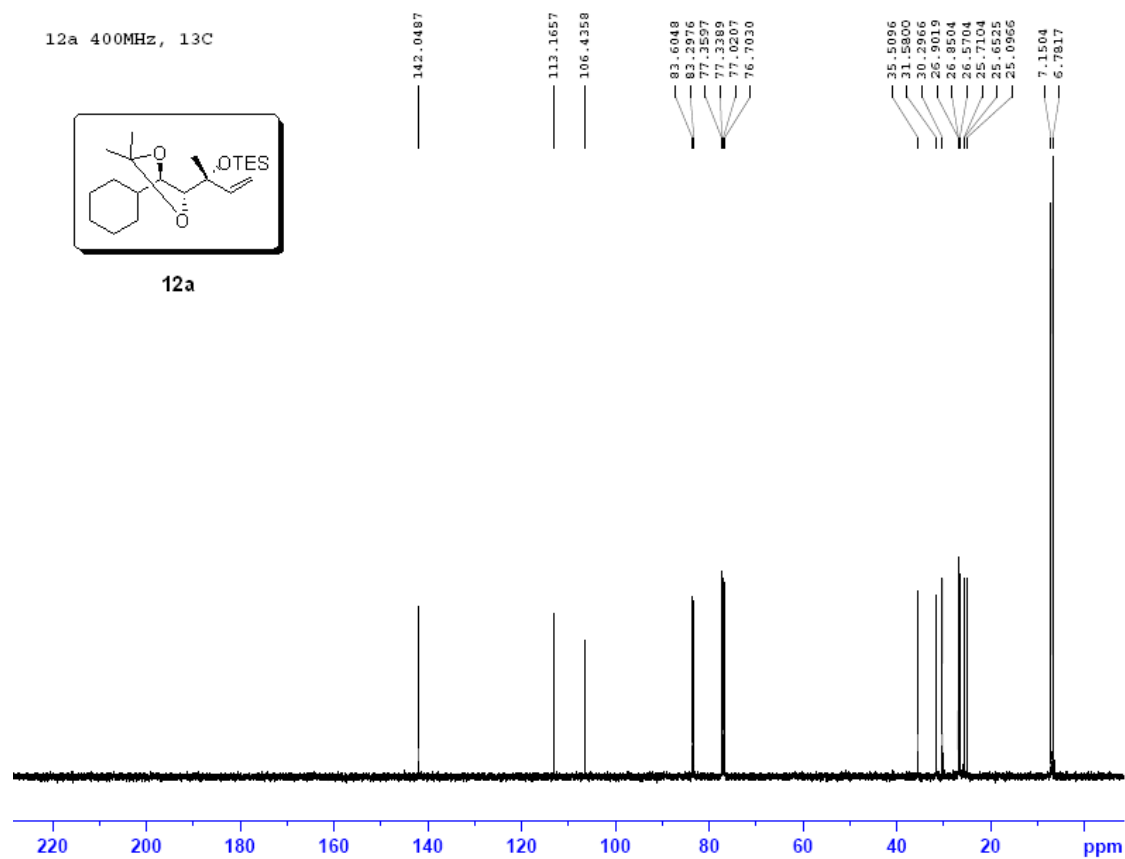

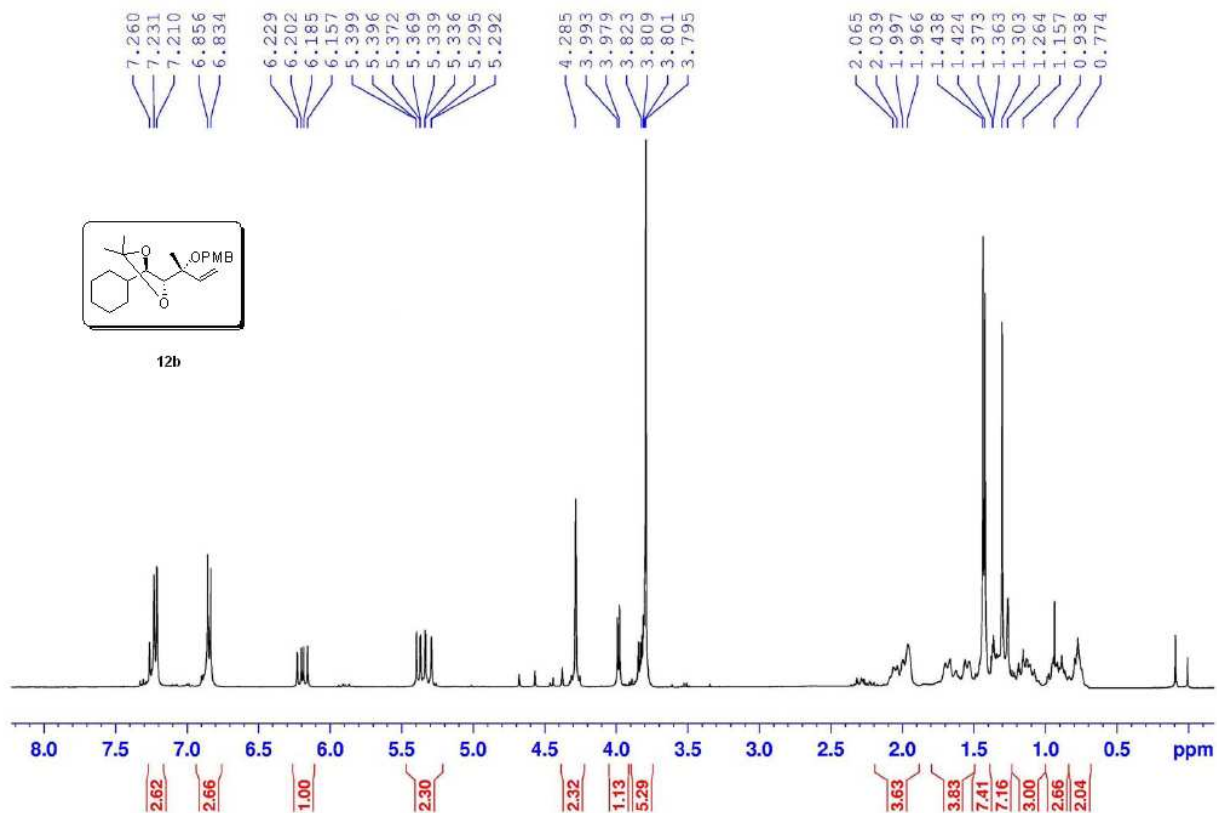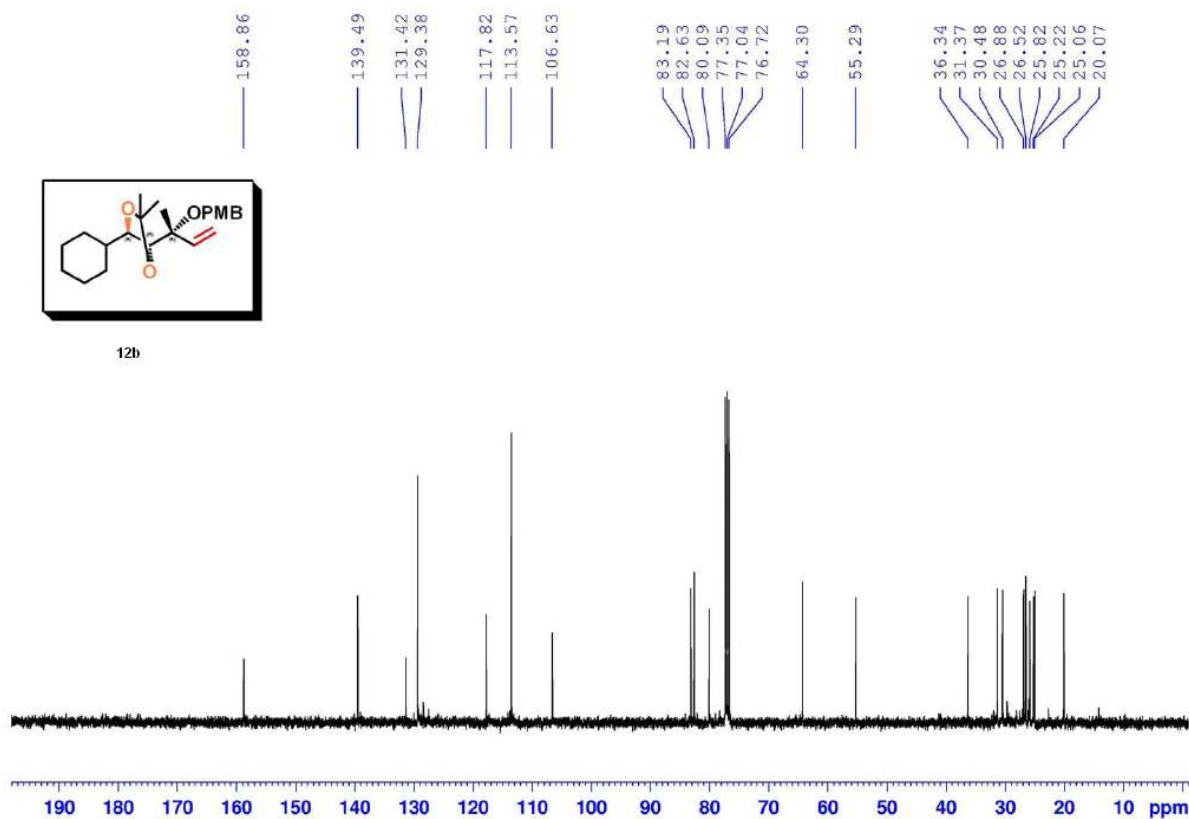



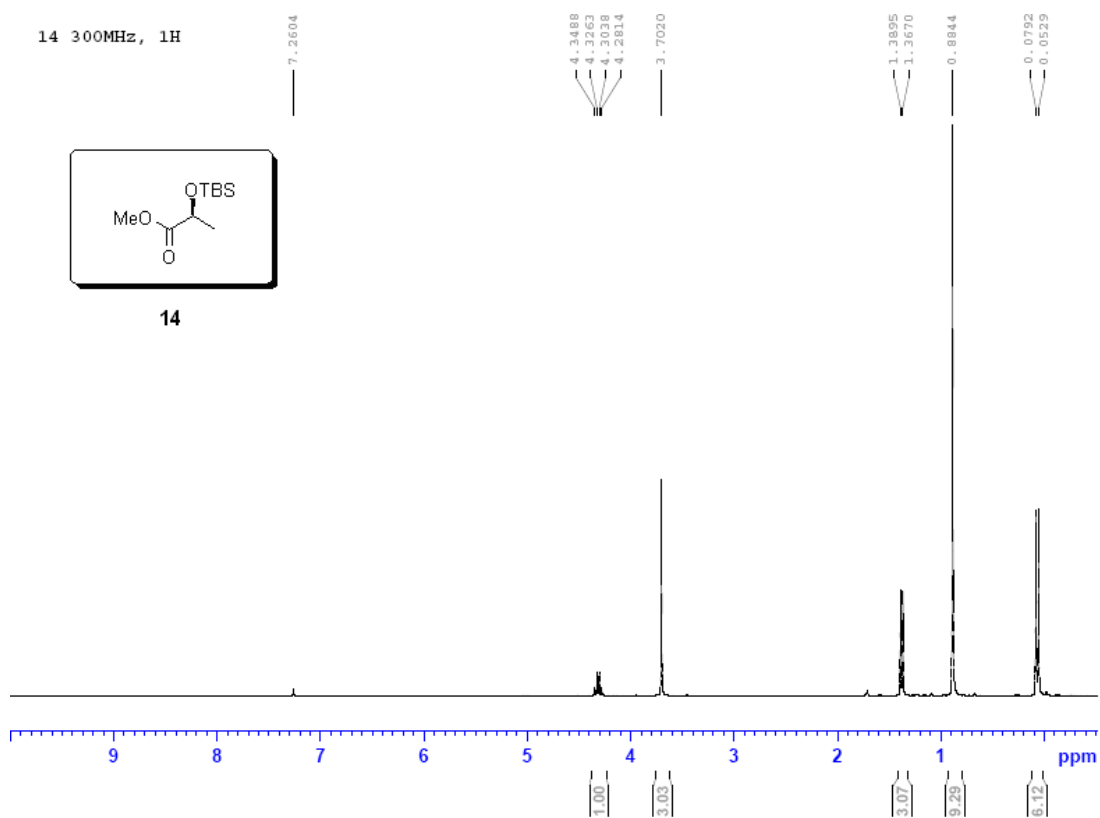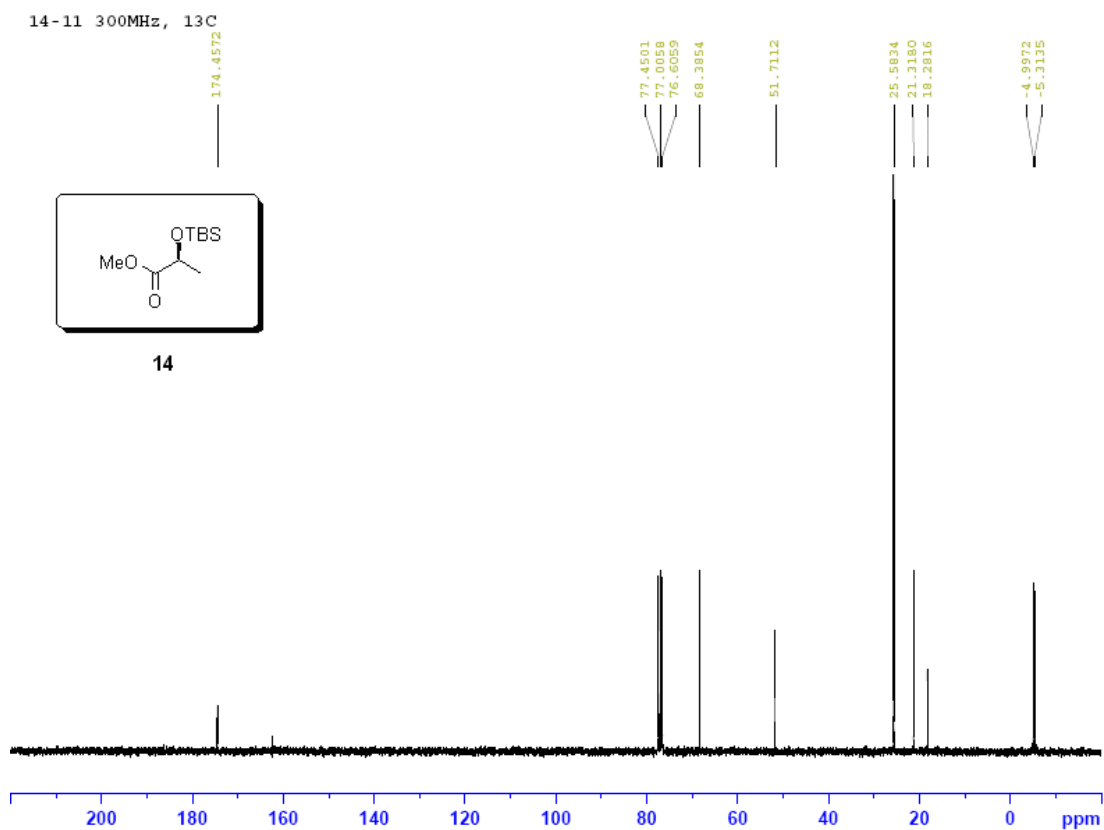

15 400MHz, <sup>1</sup>H

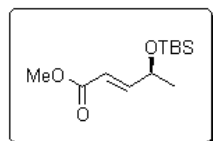

15

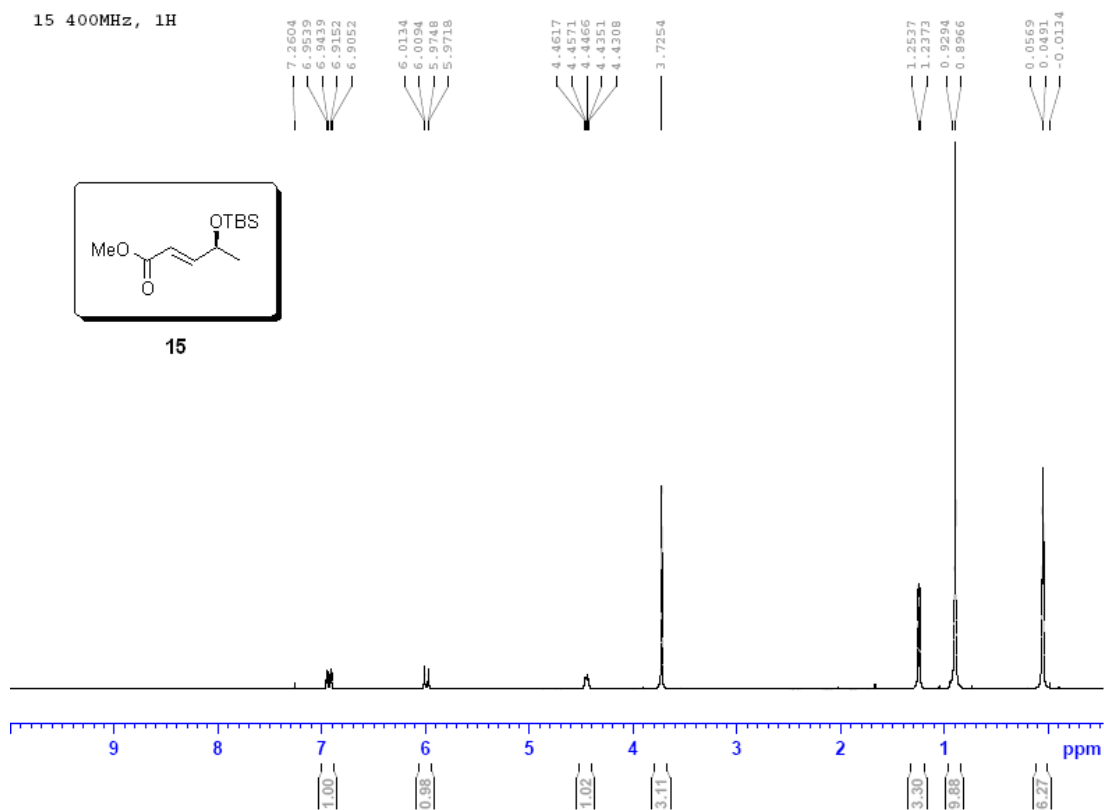

15 400MHz, <sup>13</sup>C

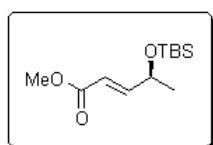

15

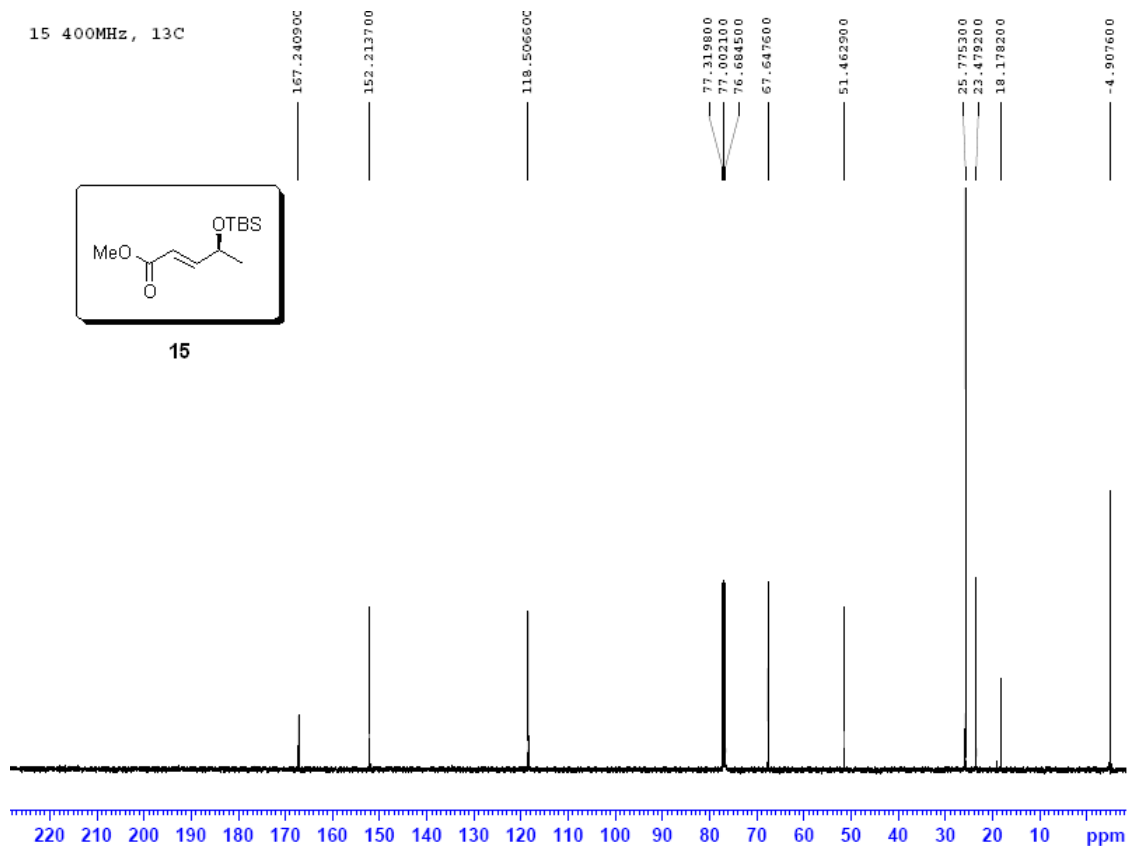

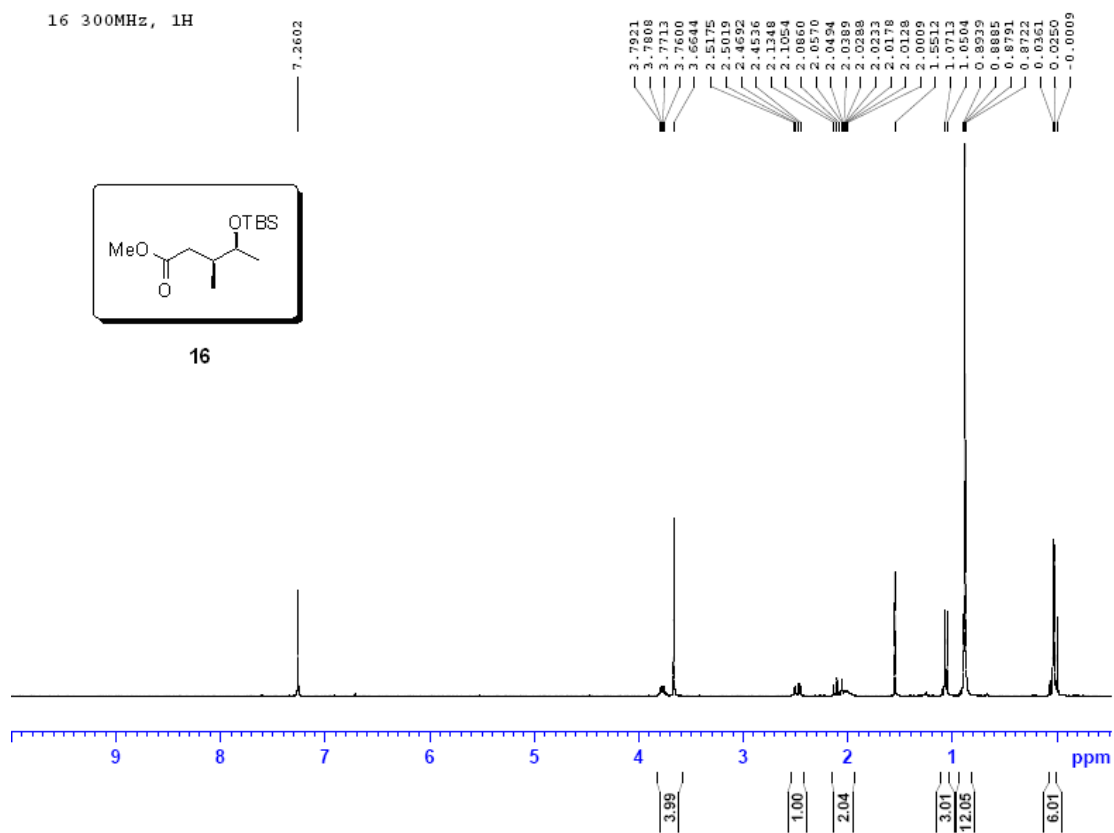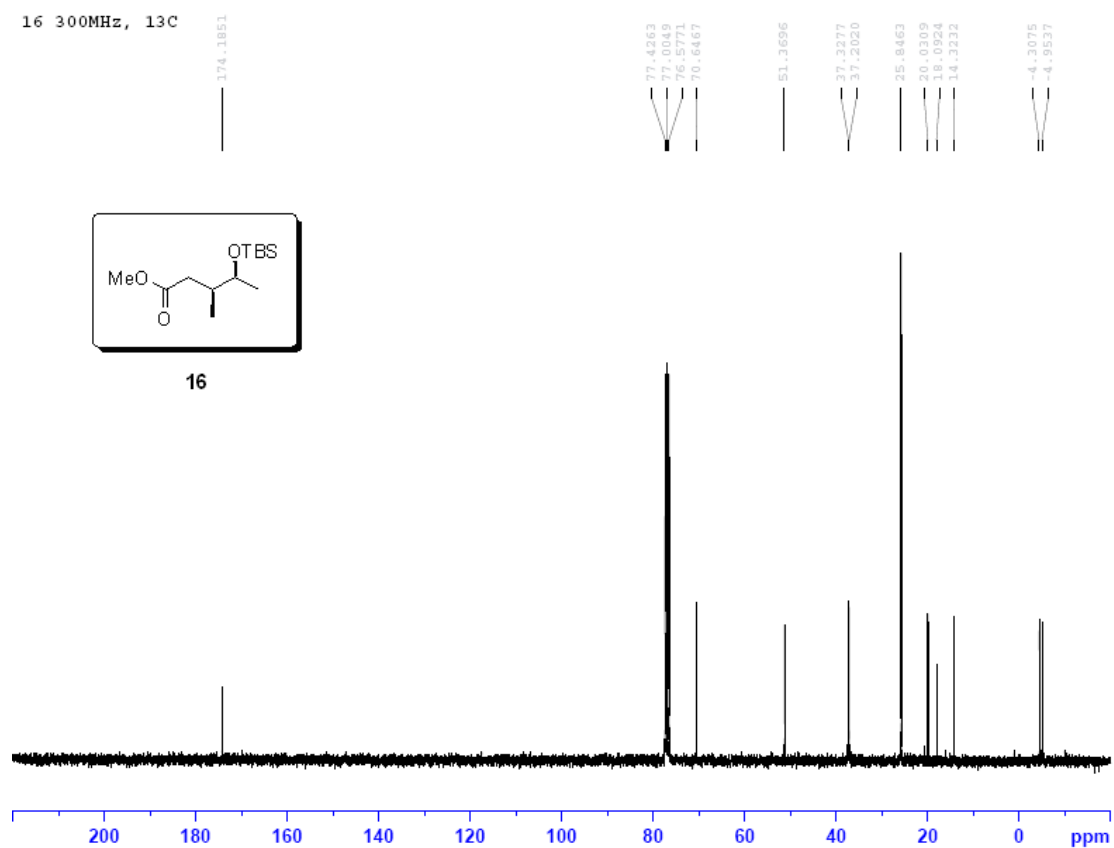

16 300MHz, crude 13C

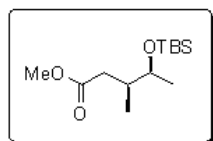

16

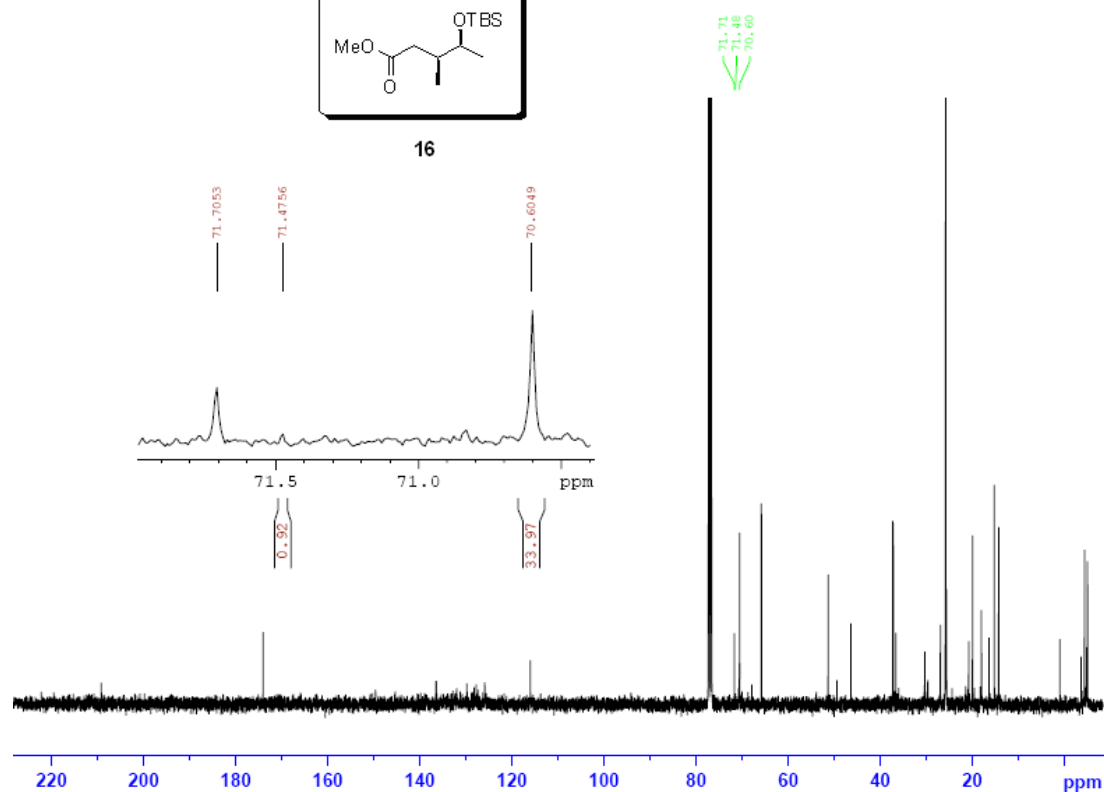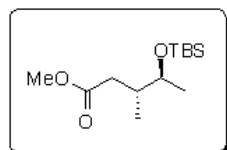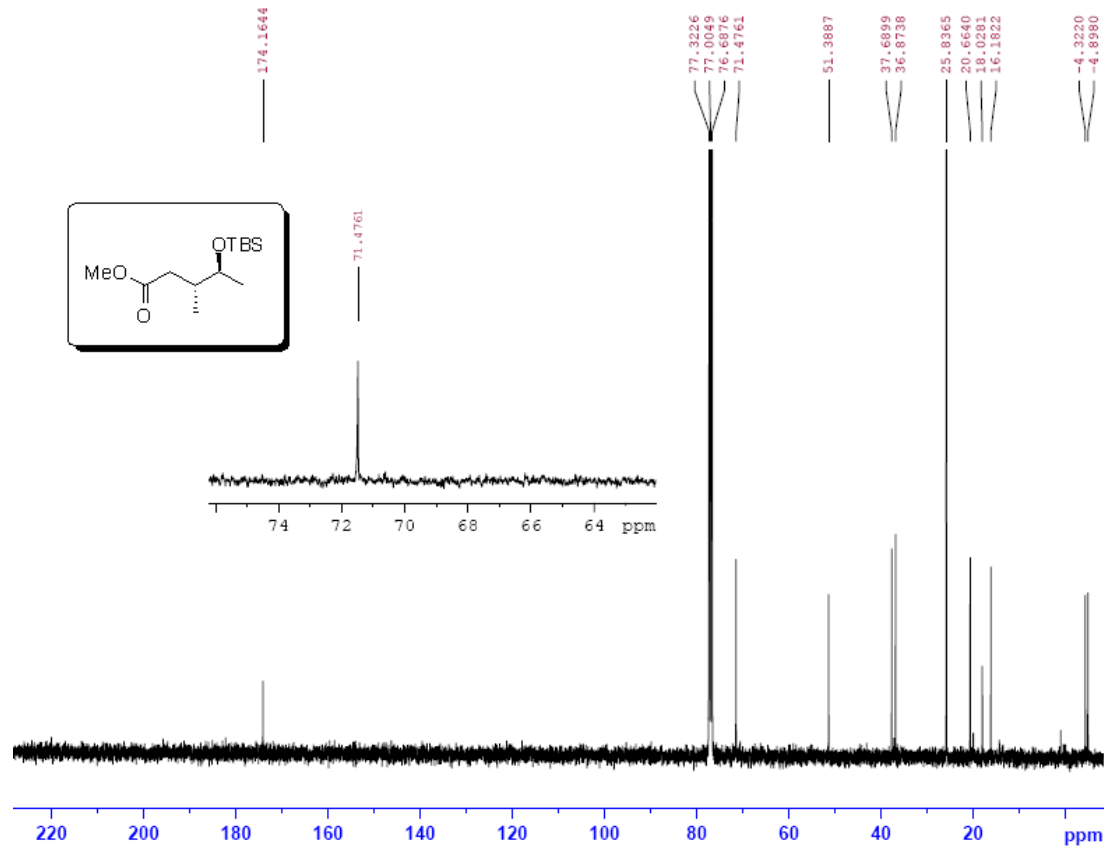

17 400MHz, 1H

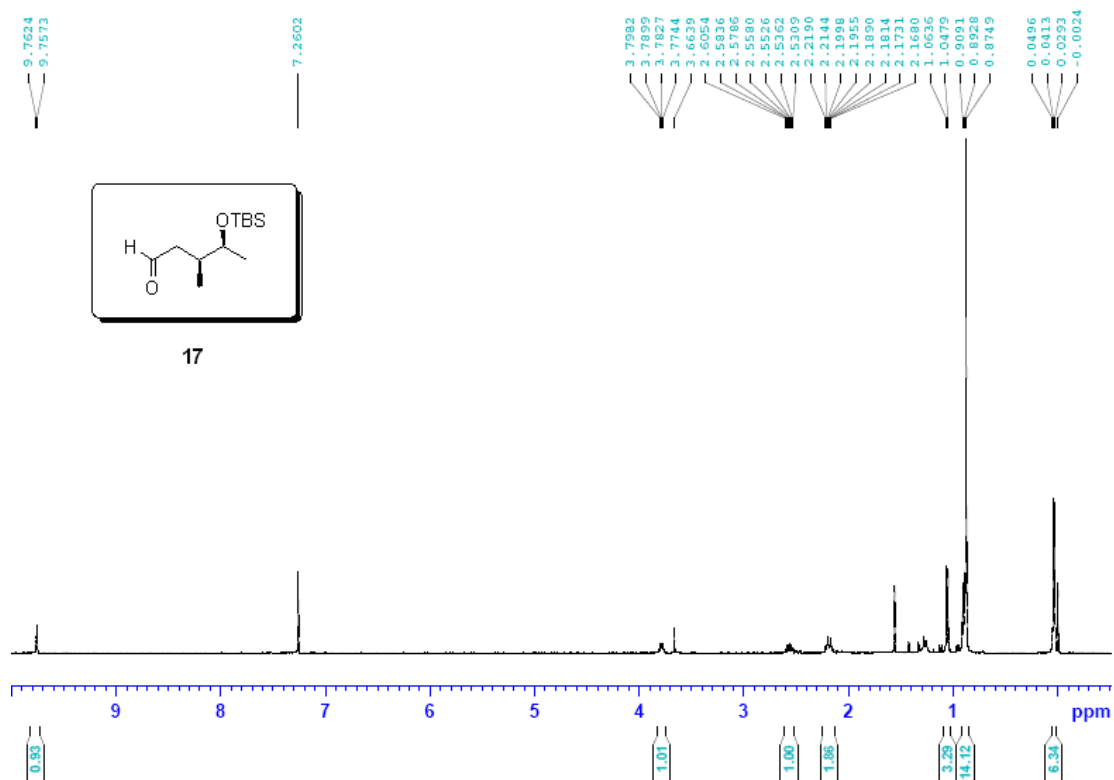

18 400MHz, <sup>1</sup>H

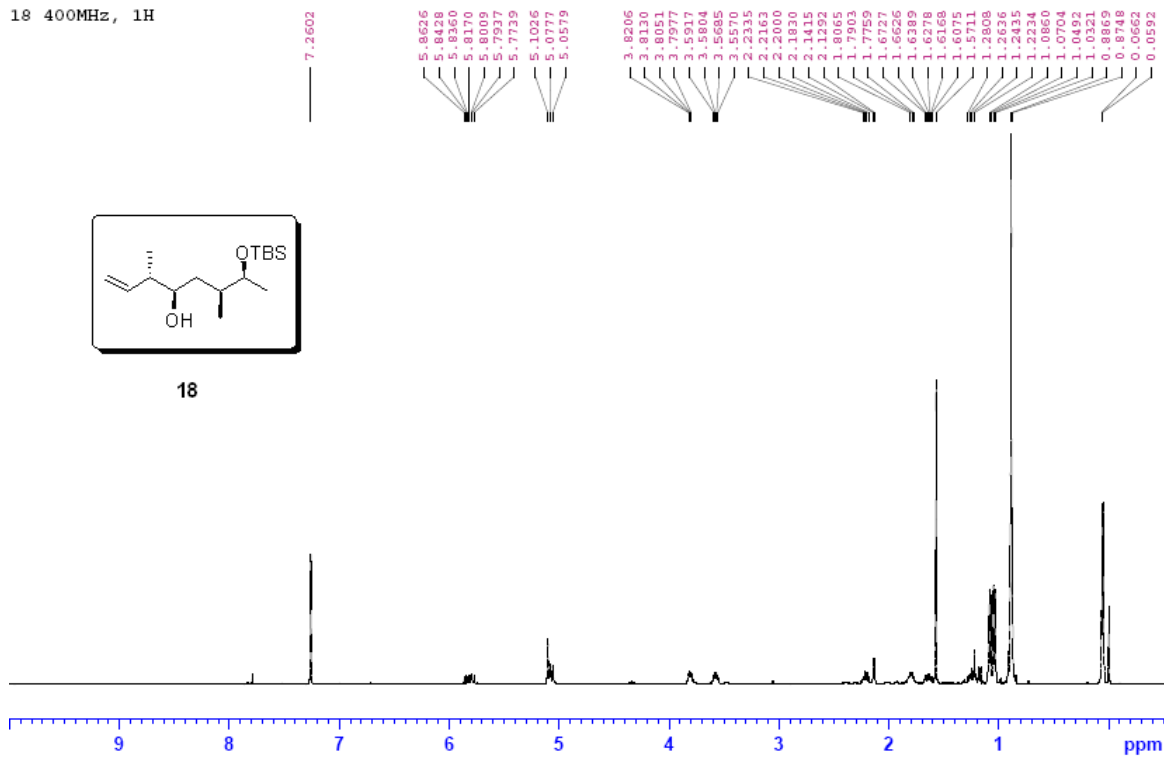

18 400MHz, <sup>13</sup>C

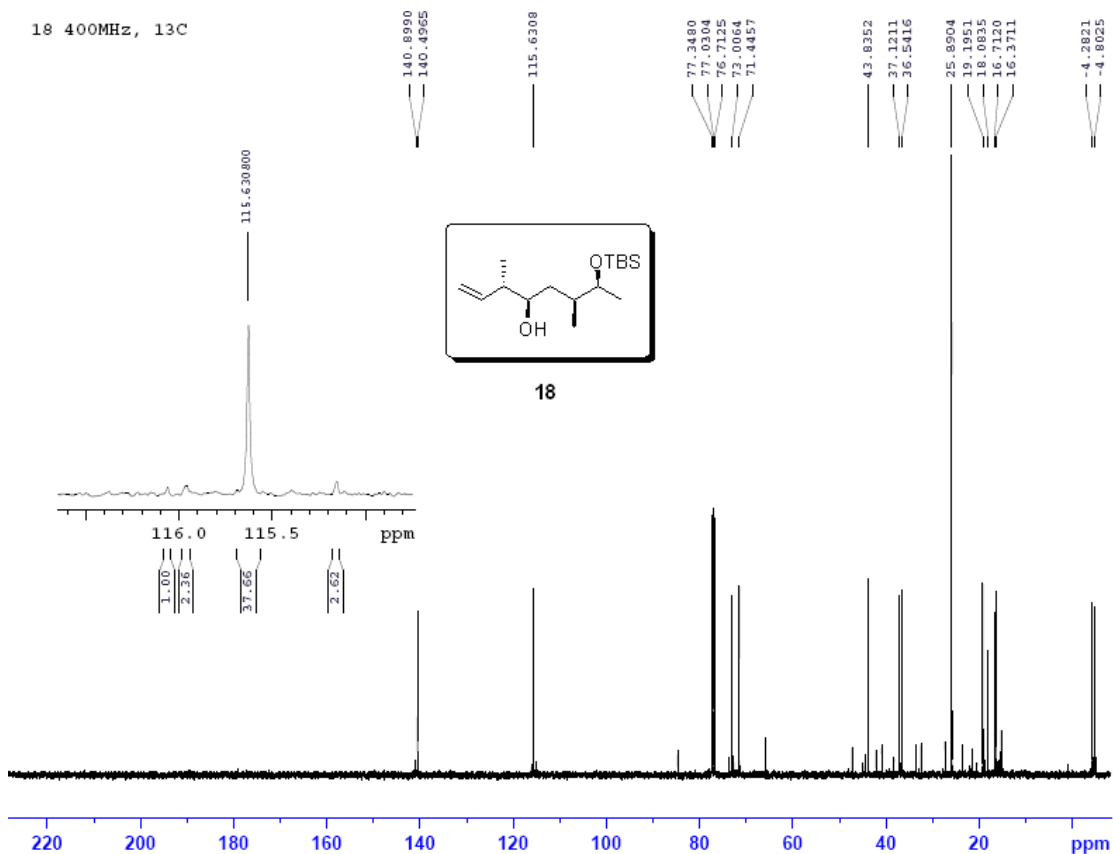

19 300MHz, <sup>1</sup>H

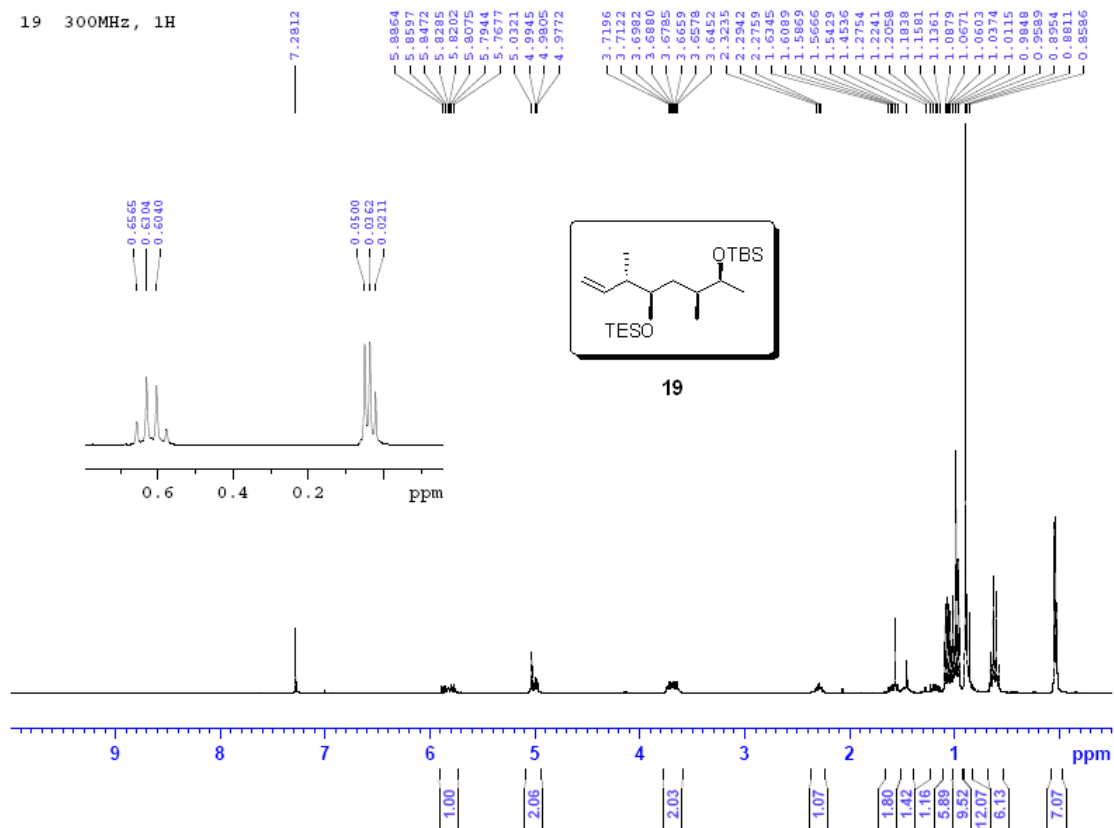

19 400MHz, <sup>13</sup>C

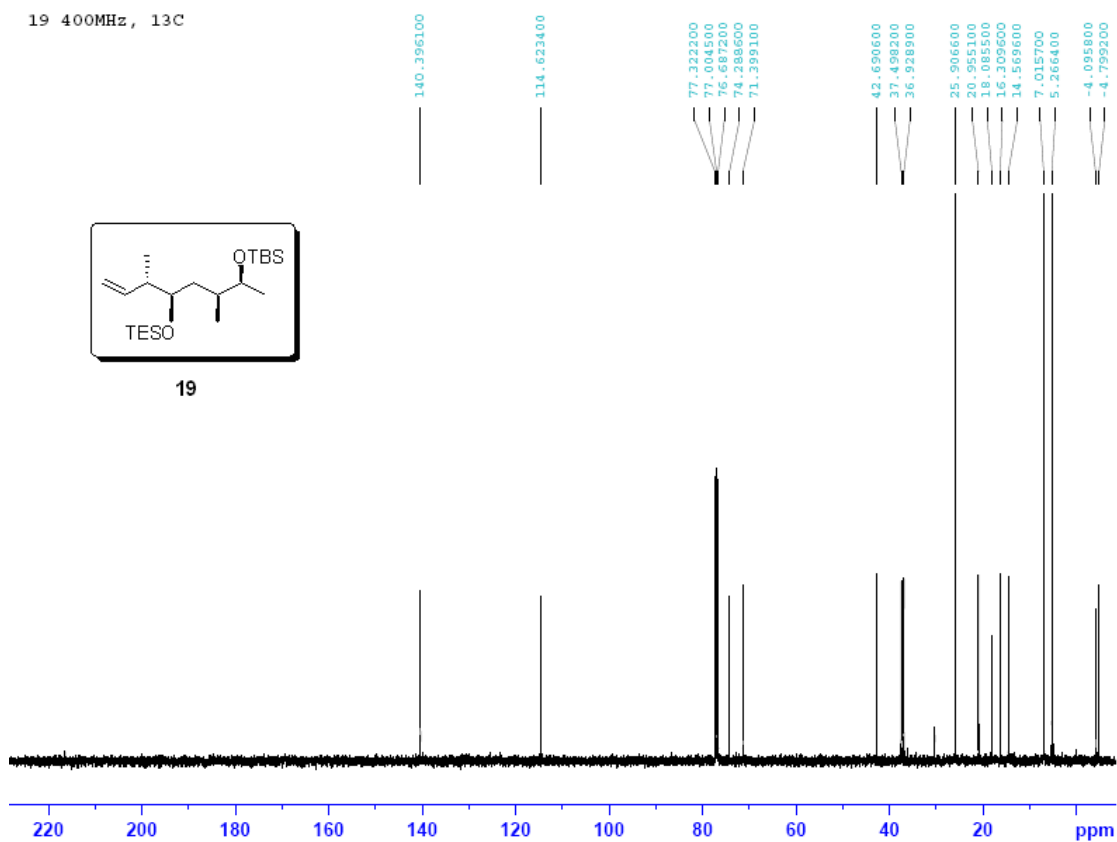

1.2597

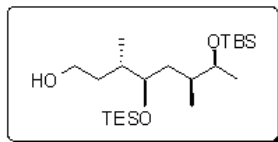

20

77.4272  
77.0035  
76.5799  
74.7817  
71.8253

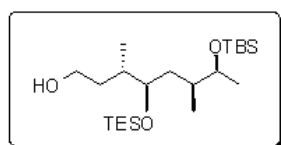

20

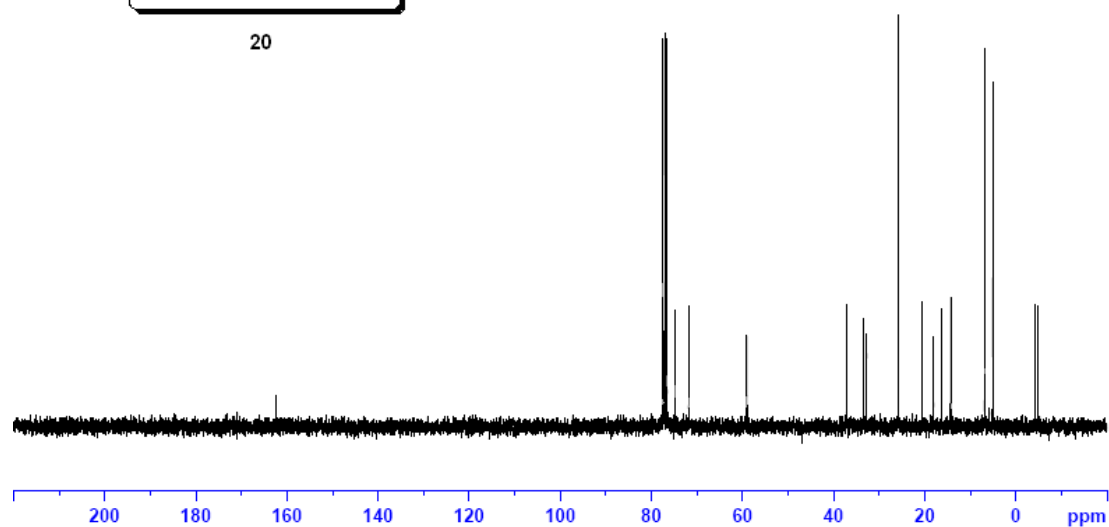



21 500MHz, <sup>1</sup>H

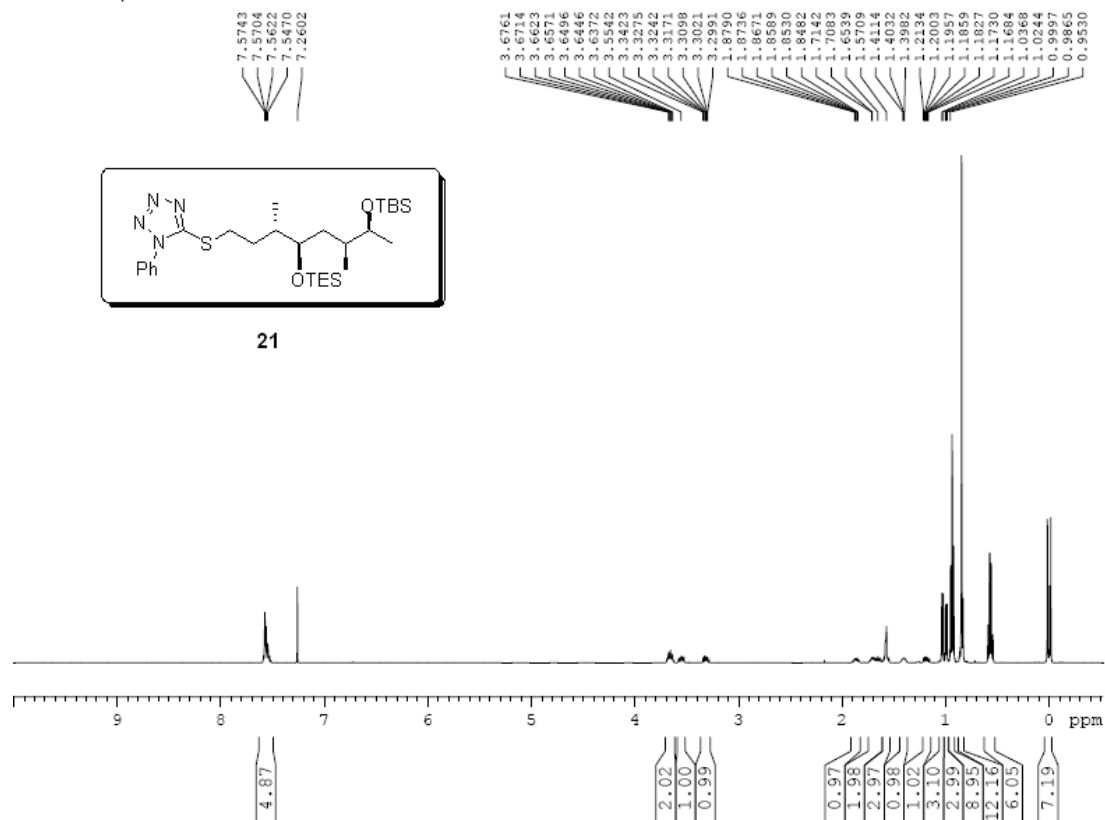

21 500MHz, <sup>13</sup>C

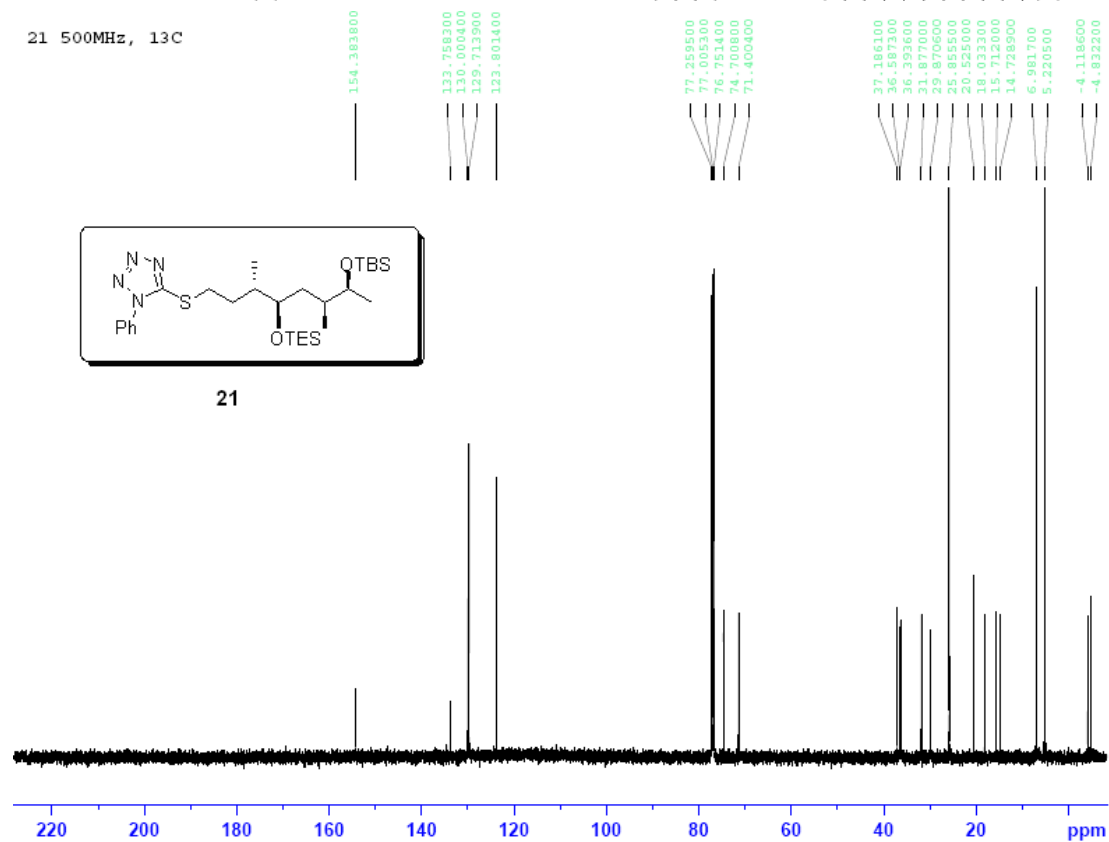

22 400MHz, <sup>1</sup>H

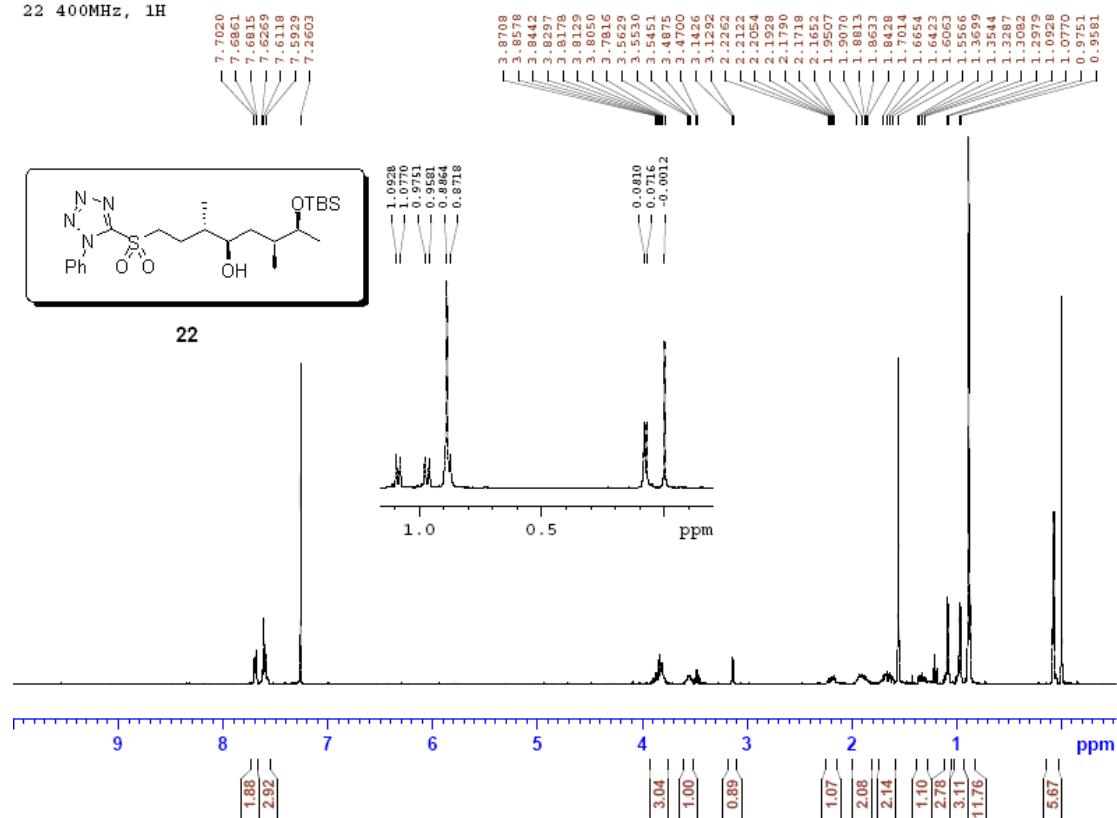

22 400MHz, <sup>13</sup>C

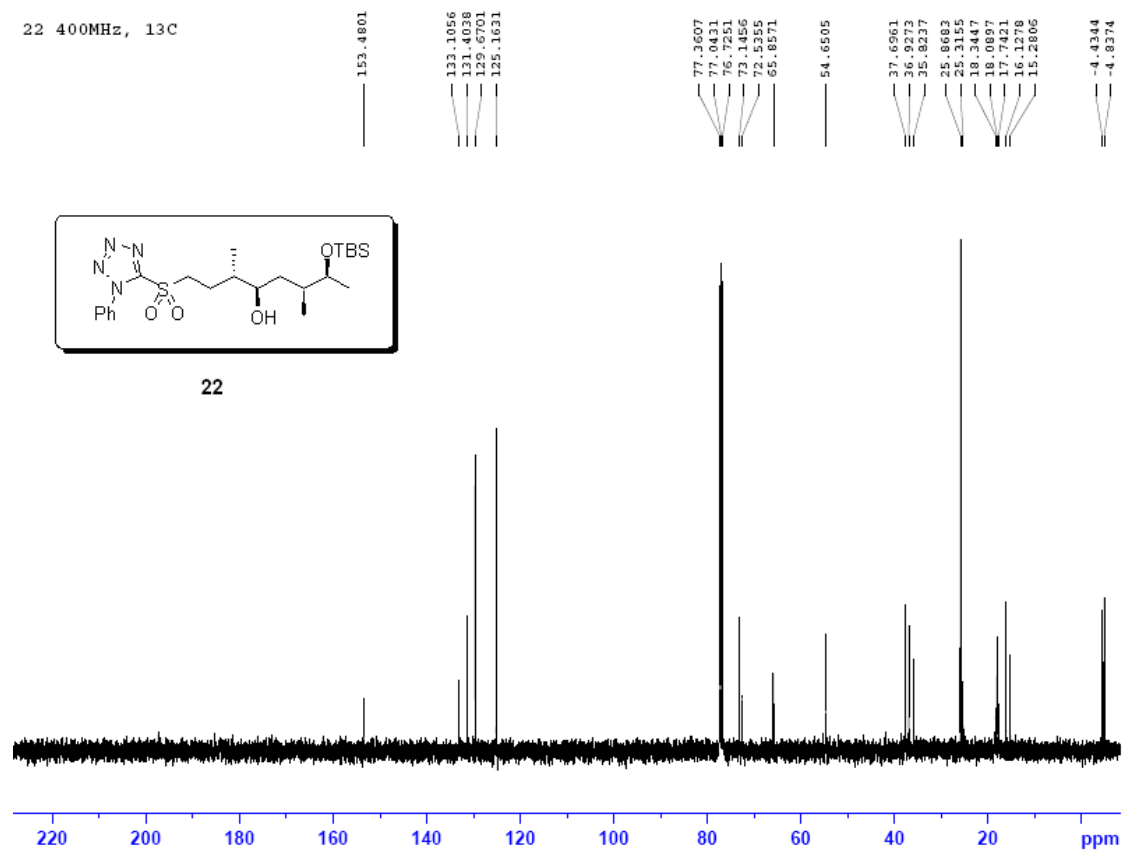

Supplement: Supplementary file 1 [file 4532017]
